# Supplementary material
Source: PubMed Central journal article supplement (PMC3383340)
Supplement: NIHMS380051-supplement-1_si_001.pdf [file NIHMS380051-supplement-1_si_001.pdf]

# Supporting Information

## Testing Physical Models of Passive Membrane Permeation

Siegfried S. F. Leung,<sup>†</sup> Jona Mijalkovic,<sup>†</sup> Kenneth Borrelli,<sup>‡</sup> Matthew P. Jacobson<sup>\*†</sup>

Department of Pharmaceutical Chemistry, University of California, San Francisco, California, 94158,  
and Schrödinger, Inc. 120 West 4<sup>th</sup> Street, 32<sup>nd</sup> Floor, New York, New York, 10036.

\* To whom correspondence should be addressed. E-mail: [matt.jacobson@ucsf.edu](mailto:matt.jacobson@ucsf.edu)

<sup>†</sup> Department of Pharmaceutical Chemistry, University of California, San Francisco.

<sup>‡</sup> Schrödinger, Inc.

### Table of Contents

|           |                                                                                                                                                                            |
|-----------|----------------------------------------------------------------------------------------------------------------------------------------------------------------------------|
| Page S1.  | Table of Contents.                                                                                                                                                         |
| Page S2.  | <b>Table S1.</b> Experimental data of examined data sets.                                                                                                                  |
| Page S7.  | <b>Table S2.</b> Predictions and compound classification of examined data sets.                                                                                            |
| Page S12. | Chemical structures from congeneric sets.                                                                                                                                  |
| Page S14. | <b>Table S3.</b> The correlation coefficients from linear regression analyses between cell-based assay data and physics-based permeability predictions with all compounds. |
| Page S15. | <b>Table S4.</b> The Spearman's rank correlation coefficients between cell-based assay data and physics-based permeability predictions with all compounds.                 |
| Page S16. | The linear regression models between cell-based assay data and physics-based permeability predictions with all compounds.                                                  |
| Page S17. | <b>Table S5.</b> The correlation coefficients from linear regression analyses between <i>in vivo</i> data and physics-based permeability predictions with all compounds.   |
| Page S18. | <b>Table S6.</b> The Spearman's rank correlation coefficients between <i>in vivo</i> data and physics-based permeability predictions with all compounds.                   |
| Page S19. | The linear regression models between <i>in vivo</i> data and physics-based permeability predictions with all compounds.                                                    |
| Page S20. | Estimation of $K_{\text{barrier}}$ from air/water partition.                                                                                                               |
| Page S27. | References.                                                                                                                                                                |

**Table S1.** Experimental data of examined data sets.

| Molecule                 | Log $P_{PAMPA}^a$ |          |         |       |          |    |          | Log $P_{Caco-2}^b$ |          |         |          |         |        | Log $P_{MDCK}^c$ | %Abs <sup>d</sup> |          | Log $P_{app}^e$ |         |
|--------------------------|-------------------|----------|---------|-------|----------|----|----------|--------------------|----------|---------|----------|---------|--------|------------------|-------------------|----------|-----------------|---------|
|                          | Avdeef            | Balimane | Bermejo | Di    | Fujikawa | Li | Whitlock | Avdeef             | Balimane | Bermejo | Fujikawa | Goodwin | Irvine | Li               | Irvine            | Balimane | Irvine          | Bermejo |
| 2,4-dichlorophenol       |                   |          |         |       | -3.90    |    |          |                    |          |         |          |         |        |                  |                   |          |                 |         |
| 2,4-dimethylphenol       |                   |          |         |       | -3.58    |    |          |                    |          |         |          |         |        |                  |                   |          |                 |         |
| 2,5-dichloronitrobenzene |                   |          |         |       | -4.09    |    |          |                    |          |         |          |         |        |                  |                   |          |                 |         |
| 2-chloroaniline          |                   |          |         |       | -3.61    |    |          |                    |          |         |          |         |        |                  |                   |          |                 |         |
| 2-chlorophenol           |                   |          |         |       | -4.82    |    |          |                    |          |         |          |         |        |                  |                   |          |                 |         |
| 2-methylphenol           |                   |          |         |       | -3.53    |    |          |                    |          |         |          |         |        |                  |                   |          |                 |         |
| 2-nitroaniline           |                   |          |         |       | -3.64    |    |          |                    |          |         |          |         |        |                  |                   |          |                 |         |
| 2-nitrophenol            |                   |          |         |       | -3.66    |    |          |                    |          |         |          |         |        |                  |                   |          |                 |         |
| 3-chloroaniline          |                   |          |         |       | -3.58    |    |          |                    |          |         |          |         |        |                  |                   |          |                 |         |
| 3-nitroaniline           |                   |          |         |       | -3.71    |    |          |                    |          |         |          |         |        |                  |                   |          |                 |         |
| 3-nitrophenol            |                   |          |         |       | -4.16    |    |          |                    |          |         |          |         |        |                  |                   |          |                 |         |
| 4-chloroaniline          |                   |          |         |       | -3.59    |    |          |                    |          |         |          |         |        |                  |                   |          |                 |         |
| 4-cyanophenol            |                   |          |         |       | -4.65    |    |          |                    |          |         |          |         |        |                  |                   |          |                 |         |
| 4-nitroaniline           |                   |          |         |       | -3.91    |    |          |                    |          |         |          |         |        |                  |                   |          |                 |         |
| Acetabulol               |                   | -5.80    |         |       | -5.58    |    |          | -5.40              |          | -6.29   |          |         | -5.42  |                  | -5.77             | 55       | 90              |         |
| Acetaminophen            |                   |          |         |       | -5.65    |    |          |                    |          |         |          |         | -4.00  |                  | -4.46             |          | 80              |         |
| Acetylsalicylic acid     |                   |          |         |       |          |    |          |                    |          |         |          |         | -5.66  |                  | -5.13             |          | 100             |         |
| Acrivastine              |                   |          |         |       |          |    |          |                    |          |         |          |         | -5.72  |                  | -5.66             |          | 88              |         |
| Acyclovir                |                   |          |         |       |          |    |          |                    |          |         |          |         |        |                  | -6.68             |          | 16              |         |
| Aldosterone              |                   |          |         | -5.92 |          |    |          |                    |          |         |          |         |        |                  |                   |          |                 |         |
| Alfentanil               | -3.53             |          |         |       |          |    |          | -3.49              |          |         |          |         |        |                  |                   |          |                 |         |
| Alprazolam               |                   |          |         | -5.27 |          |    |          |                    |          |         |          |         |        |                  |                   |          |                 |         |
| Alprenolol               | 0.02              | -4.52    |         |       | -4.21    |    |          | -1.75              | -4.95    |         | -4.60    |         | -3.77  |                  | -3.80             | 93       | 93              |         |
| Amiloride                |                   | -6.30    |         |       |          |    |          |                    | -5.31    |         |          |         |        |                  |                   | 50       |                 |         |
| Aminopyrine              |                   |          |         |       | -4.14    |    |          |                    |          |         | -4.44    |         |        |                  |                   |          |                 |         |
| Amoxicillin              |                   |          |         |       |          |    |          |                    |          |         |          |         | -7.68  |                  | -6.62             |          | 94              |         |
| Aniline                  |                   |          |         |       | -3.51    |    |          |                    |          |         |          |         |        |                  |                   |          |                 |         |
| Antipyrine               |                   |          |         |       | -5.00    |    |          |                    |          |         |          |         | -3.82  |                  | -3.82             |          | 100             |         |
| Astemizole               |                   |          |         | -4.96 |          |    |          |                    |          |         |          |         |        |                  |                   |          |                 |         |
| Atenolol                 | -5.06             |          |         | -6.10 |          |    |          | -4.50              |          |         |          |         | -5.48  |                  | -5.74             |          | 50              |         |
| Atrazine                 |                   |          |         |       | -4.14    |    |          |                    |          |         | -4.39    |         |        |                  |                   |          |                 |         |
| AZT                      |                   |          |         |       |          |    |          |                    |          |         |          |         | -4.55  |                  | -5.22             |          | 100             |         |
| Benthiocarb              |                   |          |         |       | -4.03    |    |          |                    |          |         |          |         |        |                  |                   |          |                 |         |
| Biphenyl                 |                   |          |         |       | -4.27    |    |          |                    |          |         |          |         |        |                  |                   |          |                 |         |
| BPMC                     |                   |          |         |       | -3.88    |    |          |                    |          |         |          |         |        |                  |                   |          |                 |         |
| Bu-ciprofloxacin         |                   |          |         | -3.52 |          |    |          |                    |          | -4.52   |          |         |        |                  |                   |          |                 | -3.85   |
| Bu-norfloxacin           |                   |          |         | -3.44 |          |    |          |                    |          |         |          |         |        |                  |                   |          |                 | -3.86   |
| Bupropion                |                   |          |         |       |          |    |          |                    |          |         |          |         | -3.82  |                  | -3.89             |          | 87              |         |
| Caffeine                 |                   |          |         | -5.89 | -4.80    |    |          |                    |          |         | -4.51    |         |        |                  |                   |          |                 |         |
| Cefatrizine              |                   |          |         |       |          |    |          |                    |          |         |          |         | -6.12  |                  | -5.60             |          | 76              |         |
| Cefuroxime               |                   |          |         |       |          |    |          |                    |          |         |          |         | -6.42  |                  | -6.80             |          | 5               |         |
| Cephalexin               |                   |          |         |       |          |    |          |                    |          |         |          |         | -6.57  |                  | -6.32             |          | 98              |         |
| Chloramphenicol          |                   |          |         |       | -5.24    |    |          |                    |          |         |          |         |        |                  |                   |          |                 |         |
| Chlorothiazide           |                   |          |         |       |          |    |          |                    |          |         |          |         | -6.49  |                  | -6.52             |          | 13              |         |

| Molecule                        | LogP <sub>PAMPA</sub> <sup>a</sup> |          |         |       |          |    |          | LogP <sub>Caco-2</sub> <sup>b</sup> |          |         |          |         |        |       | LogP <sub>MDCK</sub> <sup>c</sup> |          | %Abs <sup>d</sup> |         | LogP <sub>app</sub> <sup>e</sup> |
|---------------------------------|------------------------------------|----------|---------|-------|----------|----|----------|-------------------------------------|----------|---------|----------|---------|--------|-------|-----------------------------------|----------|-------------------|---------|----------------------------------|
|                                 | Avdeef                             | Balimane | Bermejo | Di    | Fujikawa | Li | Whitlock | Avdeef                              | Balimane | Bermejo | Fujikawa | Goodwin | Irvine | Li    | Irvine                            | Balimane | Irvine            | Bermejo |                                  |
| Chlorpromazine                  |                                    |          |         | -5.19 |          |    |          |                                     |          |         |          |         |        |       |                                   |          |                   |         |                                  |
| Cimetidine                      | -6.20                              | -5.66    |         |       |          |    |          | -6.44                               | -5.54    |         |          |         |        |       |                                   | 79       |                   |         |                                  |
| Ciprofloxacin                   |                                    |          | -5.57   |       |          |    |          |                                     |          | -5.54   |          |         |        |       |                                   |          |                   | -4.81   |                                  |
| Clobazam                        |                                    |          |         | -4.77 |          |    |          |                                     |          |         |          |         |        |       |                                   |          |                   |         |                                  |
| Clonidine                       |                                    |          |         | -5.28 | -4.94    |    |          |                                     |          |         | -4.66    |         |        |       |                                   |          |                   |         |                                  |
| CNV97100                        |                                    |          | -5.42   |       |          |    |          |                                     |          | -5.20   |          |         |        |       |                                   |          |                   | -4.51   |                                  |
| CNV97101                        |                                    |          | -4.70   |       |          |    |          |                                     |          | -4.66   |          |         |        |       |                                   |          |                   | -4.38   |                                  |
| CNV97102                        |                                    |          | -4.29   |       |          |    |          |                                     |          | -4.77   |          |         |        |       |                                   |          |                   | -4.11   |                                  |
| CNV97103                        |                                    |          | -3.80   |       |          |    |          |                                     |          | -4.82   |          |         |        |       |                                   |          |                   | -3.97   |                                  |
| CNV97104                        |                                    |          | -3.38   |       |          |    |          |                                     |          | -4.86   |          |         |        |       |                                   |          |                   | -3.90   |                                  |
| Corticosterone                  |                                    |          |         | -5.29 | -4.47    |    |          |                                     |          |         | -4.67    |         | -3.92  |       | -3.85                             |          | 100               |         |                                  |
| Coumarin                        |                                    |          |         |       | -3.56    |    |          |                                     |          |         |          |         |        |       |                                   |          |                   |         |                                  |
| Desipramine                     |                                    | -4.15    |         | -4.92 | -3.81    |    |          |                                     | -4.52    |         | -4.61    |         |        |       |                                   | 95       |                   |         |                                  |
| Dexamethasone                   |                                    | -4.54    |         |       | -4.95    |    |          |                                     | -4.87    |         | -4.91    |         | -4.40  |       | -4.70                             | 95       | 100               |         |                                  |
| Diazepam                        |                                    |          |         | -4.80 |          |    |          |                                     |          |         |          |         |        |       |                                   |          |                   |         |                                  |
| Diazinon                        |                                    |          |         |       | -4.51    |    |          |                                     |          |         | -4.32    |         |        |       |                                   |          |                   |         |                                  |
| Diethylphthalate                |                                    |          |         |       | -4.33    |    |          |                                     |          |         |          |         |        |       |                                   |          |                   |         |                                  |
| Dilthiazem                      | -1.33                              |          |         |       | -3.91    |    |          | -2.88                               |          |         |          |         |        |       |                                   |          |                   |         |                                  |
| Dimethylphthalate               |                                    |          |         |       | -3.80    |    |          |                                     |          |         |          |         |        |       |                                   |          |                   |         |                                  |
| Diphenylamine                   |                                    |          |         |       | -4.82    |    |          |                                     |          |         | -4.40    |         |        |       |                                   |          |                   |         |                                  |
| Diphenylamine-2-carboxylic acid |                                    |          |         |       | -4.61    |    |          |                                     |          |         |          |         |        |       |                                   |          |                   |         |                                  |
| DMTP                            |                                    |          |         |       | -4.33    |    |          |                                     |          |         | -4.32    |         |        |       |                                   |          |                   |         |                                  |
| Dopamine                        |                                    |          |         | -6.70 |          |    |          |                                     |          |         |          |         |        |       |                                   |          |                   |         |                                  |
| Enoxacin                        |                                    |          |         | -6.05 |          |    |          |                                     |          |         |          |         |        |       |                                   |          |                   |         |                                  |
| Estradiol                       |                                    |          |         | -4.92 |          |    |          |                                     |          |         |          |         |        |       |                                   |          |                   |         |                                  |
| Etoposide                       |                                    | -5.46    |         |       |          |    |          |                                     | -5.74    |         |          |         |        |       |                                   | 50       |                   |         |                                  |
| Fenaterol                       |                                    | -6.52    |         |       |          |    |          |                                     |          |         |          |         |        |       |                                   | 60       |                   |         |                                  |
| Flumequine                      |                                    |          | -3.84   |       |          |    |          |                                     |          | -4.54   |          |         |        |       |                                   |          |                   | -3.77   |                                  |
| Fluparoxan                      |                                    |          |         |       |          |    |          |                                     |          |         |          |         | -3.70  |       | -3.60                             |          | 100               |         |                                  |
| Furosemide                      |                                    | -6.05    |         |       | -6.24    |    |          |                                     | -5.70    |         |          |         | -6.85  |       | -6.21                             | 66       | 61                |         |                                  |
| Gabapentin                      |                                    |          |         |       |          |    |          |                                     |          |         |          |         | -8.00  |       | -6.44                             |          | 50                |         |                                  |
| Guanabenz                       |                                    |          |         |       |          |    |          |                                     |          |         |          |         | -4.00  |       | -3.72                             |          | 75                |         |                                  |
| Hydralazine                     |                                    | -4.98    |         |       |          |    |          |                                     | -4.85    |         |          |         |        |       |                                   | 90       |                   |         |                                  |
| Hydrochlorothiazide             |                                    |          |         |       | -6.54    |    |          |                                     |          | -6.29   |          | -6.04   |        | -6.00 |                                   |          | 67                |         |                                  |
| Hydrocortisone                  |                                    |          |         | -5.72 | -5.07    |    |          |                                     |          | -4.85   |          | -4.25   |        | -4.51 |                                   |          | 91                |         |                                  |
| Hydroquinone                    |                                    |          |         |       | -5.34    |    |          |                                     |          |         |          |         |        |       |                                   |          |                   |         |                                  |
| IBP                             |                                    |          |         |       | -3.44    |    |          |                                     |          |         | -4.28    |         |        |       |                                   |          |                   |         |                                  |
| Ibuprofen                       |                                    |          |         |       | -4.14    |    |          |                                     |          |         |          |         |        |       |                                   |          |                   |         |                                  |
| Imidacloprid                    |                                    |          |         |       | -5.28    |    |          |                                     |          |         |          |         |        |       |                                   |          |                   |         |                                  |
| Imipramine                      |                                    |          |         | -4.89 | -4.20    |    |          |                                     |          |         |          |         |        |       |                                   |          |                   |         |                                  |
| Isoxicam                        |                                    |          |         | -6.52 |          |    |          |                                     |          |         |          |         |        |       |                                   |          |                   |         |                                  |
| Ketoconazole                    |                                    | -4.27    |         |       |          |    |          |                                     | -4.97    |         |          |         |        |       |                                   | 76       |                   |         |                                  |
| Ketoprofen                      |                                    | -5.66    |         |       | -5.40    |    |          |                                     | -4.60    |         |          |         | -4.03  |       | -4.70                             | 90       | 100               |         |                                  |
| Labetalol                       |                                    |          |         |       | -5.25    |    |          |                                     |          |         | -5.03    |         | -4.12  |       | -4.60                             |          | 95                |         |                                  |
| Lamotrigine                     |                                    |          |         |       |          |    |          |                                     |          |         |          |         | -3.96  |       | -4.06                             |          | 70                |         |                                  |
| Lisinopril                      |                                    |          |         |       |          |    |          |                                     |          |         |          |         | -6.66  |       | -6.74                             |          | 25                |         |                                  |
| Lomefloxacin                    |                                    |          |         | -5.96 |          |    |          |                                     |          |         |          |         |        |       |                                   |          |                   |         |                                  |

| Molecule           | LogP <sub>PAMPA</sub> <sup>a</sup> |          |         |       |          |    |          | LogP <sub>Caco-2</sub> <sup>b</sup> |          |         |          |         |        |       | LogP <sub>MDCK</sub> <sup>c</sup> | %Abs <sup>d</sup> |        | LogP <sub>app</sub> <sup>e</sup> |       |       |
|--------------------|------------------------------------|----------|---------|-------|----------|----|----------|-------------------------------------|----------|---------|----------|---------|--------|-------|-----------------------------------|-------------------|--------|----------------------------------|-------|-------|
|                    | Avdeef                             | Balimane | Bermejo | Di    | Fujikawa | Li | Whitlock | Avdeef                              | Balimane | Bermejo | Fujikawa | Goodwin | Irvine | Li    | Irvine                            | Balimane          | Irvine | Bermejo                          |       |       |
| Loracarbef         |                                    |          |         |       |          |    |          |                                     |          |         |          |         |        |       |                                   |                   |        | -6.62                            | -6.04 | 100   |
| Mannitol           |                                    |          |         |       |          |    |          |                                     |          |         |          |         |        |       |                                   |                   |        |                                  | -6.24 | 15    |
| Me-ciprofloxacin   |                                    |          | -4.43   |       |          |    |          |                                     |          | -4.59   |          |         |        |       |                                   |                   |        |                                  |       | -4.20 |
| Me-norfloxacin     |                                    |          | -4.31   |       |          |    |          |                                     |          |         |          |         |        |       |                                   |                   |        |                                  |       | -4.32 |
| MEP                |                                    |          |         |       | -4.89    |    |          |                                     |          |         |          |         |        |       |                                   |                   |        |                                  |       |       |
| Metformin          |                                    | -6.30    |         |       |          |    |          |                                     | -5.92    |         |          |         |        |       |                                   |                   |        |                                  |       | 52    |
| Methoxyfenozide    |                                    |          |         |       |          |    |          |                                     |          | -4.33   |          |         |        |       |                                   |                   |        |                                  |       |       |
| Methylprednisolone |                                    |          |         |       |          |    |          |                                     |          |         |          |         |        | -4.60 |                                   |                   |        |                                  | -4.80 | 82    |
| Metoprolol         | -1.17                              | -4.58    |         |       | -4.84    |    |          | -1.35                               | -4.92    |         | -4.63    |         |        | -3.85 |                                   |                   |        |                                  | -3.82 | 95    |
| Nadolol            | -4.34                              |          |         |       | -4.49    |    |          | -4.49                               |          |         | -5.41    |         |        | -6.41 |                                   |                   |        |                                  | -5.85 | 34    |
| Naproxen           |                                    | -5.48    |         |       | -5.26    |    |          |                                     | -4.52    |         |          |         |        |       |                                   |                   |        |                                  |       | 100   |
| Netivudine         |                                    |          |         |       |          |    |          |                                     |          |         |          |         |        | -6.17 |                                   |                   |        |                                  | -5.85 | 28    |
| Norfloxacin        |                                    | -6.30    | -6.15   | -7.00 | -6.74    |    |          |                                     | -5.72    | -5.74   |          |         |        |       |                                   |                   |        |                                  |       | 35    |
| Ofloxacin          |                                    |          | -5.20   | -6.10 |          |    |          |                                     |          | -4.96   |          |         |        |       |                                   |                   |        |                                  |       | -4.69 |
| Olsalazine         |                                    |          |         |       |          |    |          |                                     |          |         |          |         |        | -7.80 |                                   |                   |        |                                  | -7.32 | 2     |
| Ondansetron        |                                    |          |         |       |          |    |          |                                     |          |         |          |         |        | -3.96 |                                   |                   |        |                                  | -3.96 | 100   |
| Oxazepam           |                                    |          |         | -5.00 |          |    |          |                                     |          |         |          |         |        |       |                                   |                   |        |                                  |       |       |
| Oxprenolol         |                                    |          |         |       | -5.03    |    |          |                                     |          |         |          |         |        | -3.80 |                                   |                   |        |                                  | -3.89 | 90    |
| Penicillin V       |                                    |          |         |       |          |    |          |                                     |          |         |          |         |        | -6.77 |                                   |                   |        |                                  | -6.82 | 45    |
| Phenol             |                                    |          |         |       | -3.83    |    |          |                                     |          |         |          |         |        |       |                                   |                   |        |                                  |       |       |
| Phenytoin          |                                    | -4.69    |         |       | -4.93    |    |          |                                     | -4.51    |         | -4.57    |         |        | -3.80 |                                   |                   |        |                                  | -3.92 | 90    |
| Pindolol           | -1.74                              |          |         |       | -5.85    |    |          | -2.58                               |          |         | -4.78    |         |        | -4.02 |                                   |                   |        |                                  | -4.23 | 90    |
| Pirenzepine        |                                    |          |         |       | -6.09    |    |          |                                     |          |         | -6.36    |         |        |       |                                   |                   |        |                                  |       |       |
| Piroxicam          |                                    |          |         | -5.60 | -4.72    |    |          |                                     |          |         | -4.45    |         |        |       |                                   |                   |        |                                  |       |       |
| Practolol          |                                    |          |         |       | -6.43    |    |          |                                     |          |         |          |         |        | -5.21 |                                   |                   |        |                                  | -5.89 | 100   |
| Pr-ciprofloxacin   |                                    |          | -3.86   |       |          |    |          |                                     |          | -4.49   |          |         |        |       |                                   |                   |        |                                  |       | -3.92 |
| Prednisolone       |                                    |          |         |       | -5.52    |    |          |                                     |          |         |          |         |        |       |                                   |                   |        |                                  |       |       |
| Pr-norfloxacin     |                                    |          | -3.88   |       |          |    |          |                                     |          | -4.47   |          |         |        |       |                                   |                   |        |                                  |       | -4.00 |
| Progesterone       |                                    |          |         | -5.03 |          |    |          |                                     |          |         |          |         |        | -4.01 |                                   |                   |        |                                  | -3.80 | 91    |
| Promazine          |                                    |          |         | -5.06 |          |    |          |                                     |          |         |          |         |        |       |                                   |                   |        |                                  |       |       |
| Propranolol        | 0.43                               | -4.39    |         |       | -4.42    |    |          | -1.48                               | -4.76    |         | -4.66    |         |        | -3.96 |                                   |                   |        |                                  | -3.77 | 90    |
| Propylthiouracil   |                                    |          |         |       |          |    |          |                                     |          |         |          |         |        | -4.02 |                                   |                   |        |                                  | -4.39 | 75    |
| Pyrene             |                                    |          |         |       | -4.32    |    |          |                                     |          |         |          |         |        |       |                                   |                   |        |                                  |       |       |
| Ranitidine         |                                    |          |         |       | -5.52    |    |          |                                     |          |         | -6.31    |         |        |       |                                   |                   |        |                                  |       | 50    |
| RH5849             |                                    |          |         |       |          |    |          |                                     |          |         | -4.34    |         |        |       |                                   |                   |        |                                  |       |       |
| Salicylic acid     |                                    |          |         |       | -5.31    |    |          |                                     |          |         | -4.66    |         |        | -4.89 |                                   |                   |        |                                  | -5.00 | 100   |
| Salthion           |                                    |          |         |       | -4.36    |    |          |                                     |          |         |          |         |        |       |                                   |                   |        |                                  |       |       |
| Sarafloxacin       |                                    |          | -4.85   |       |          |    |          |                                     |          | -5.35   |          |         |        |       |                                   |                   |        |                                  |       | -4.72 |
| Sotalol            |                                    |          |         |       |          |    |          |                                     |          |         |          |         |        | -5.38 |                                   |                   |        |                                  | -5.33 | 95    |
| Sulfasalazine      |                                    | -6.70    |         |       |          |    |          |                                     | -6.40    |         |          |         |        | -6.22 |                                   |                   |        |                                  | -6.32 | 12    |
| Sulpiride          |                                    | -6.52    |         |       |          |    |          |                                     | -6.30    |         |          |         |        |       |                                   |                   |        |                                  |       | 35    |
| Sumatriptan        |                                    |          |         |       |          |    |          |                                     |          |         |          |         |        |       |                                   |                   |        |                                  | -5.72 | 75    |
| Tebufenozide       |                                    |          |         |       |          |    |          |                                     |          |         | -4.44    |         |        |       |                                   |                   |        |                                  |       |       |
| Tenoxicam          |                                    |          |         | -7.00 |          |    |          |                                     |          |         |          |         |        |       |                                   |                   |        |                                  |       |       |
| Terbutaline        | -7.25                              | -6.52    |         |       |          |    |          | -6.15                               | -5.82    |         |          |         |        | -6.39 |                                   |                   |        |                                  | -6.00 | 50    |
| Testosterone       |                                    |          |         | -4.77 | -3.87    |    |          |                                     |          |         | -4.60    |         |        | -4.00 |                                   |                   |        |                                  | -3.85 | 100   |
| Theophylline       |                                    |          |         |       | -5.58    |    |          |                                     |          |         |          |         |        |       |                                   |                   |        |                                  |       |       |

| Molecule     | LogP <sub>PAMPA</sub> <sup>a</sup> |          |         |       |          |    |          | LogP <sub>Caco-2</sub> <sup>b</sup> |          |         |          |         |        |    | LogP <sub>MDCK</sub> <sup>c</sup> |          | %Abs <sup>d</sup> |        | LogP <sub>app</sub> <sup>e</sup> |
|--------------|------------------------------------|----------|---------|-------|----------|----|----------|-------------------------------------|----------|---------|----------|---------|--------|----|-----------------------------------|----------|-------------------|--------|----------------------------------|
|              | Avdeef                             | Balimane | Bermejo | Di    | Fujikawa | Li | Whitlock | Avdeef                              | Balimane | Bermejo | Fujikawa | Goodwin | Irvine | Li | Irvine                            | Balimane | Irvine            | Bermjo |                                  |
| Thiopental   |                                    |          |         | -4.74 |          |    |          |                                     |          |         |          |         |        |    |                                   |          |                   |        |                                  |
| Timolol      |                                    |          |         |       |          |    |          |                                     |          |         |          |         | -4.00  |    | -4.26                             |          | 90                |        |                                  |
| Trimethoprim |                                    |          |         |       | -5.38    |    |          |                                     |          |         |          |         | -4.06  |    | -4.28                             |          | 97                |        |                                  |
| Verapamil    | 0.26                               | -4.40    |         |       | -3.96    |    |          | -2.07                               | -5.01    |         |          |         |        |    |                                   | 95       |                   |        |                                  |
| Warfarin     |                                    |          |         |       |          |    |          |                                     |          |         |          |         | -4.02  |    | -4.36                             |          | 98                |        |                                  |
| Goodwin01    |                                    |          |         |       |          |    |          |                                     |          |         |          |         | -6.85  |    |                                   |          |                   |        |                                  |
| Goodwin02    |                                    |          |         |       |          |    |          |                                     |          |         |          |         | -6.60  |    |                                   |          |                   |        |                                  |
| Goodwin03a   |                                    |          |         |       |          |    |          |                                     |          |         |          |         | -6.05  |    |                                   |          |                   |        |                                  |
| Goodwin04    |                                    |          |         |       |          |    |          |                                     |          |         |          |         | -5.82  |    |                                   |          |                   |        |                                  |
| Goodwin05a   |                                    |          |         |       |          |    |          |                                     |          |         |          |         | -5.55  |    |                                   |          |                   |        |                                  |
| Goodwin06    |                                    |          |         |       |          |    |          |                                     |          |         |          |         | -5.05  |    |                                   |          |                   |        |                                  |
| Goodwin07    |                                    |          |         |       |          |    |          |                                     |          |         |          |         | -4.65  |    |                                   |          |                   |        |                                  |
| Goodwin08    |                                    |          |         |       |          |    |          |                                     |          |         |          |         | -4.60  |    |                                   |          |                   |        |                                  |
| Goodwin09a   |                                    |          |         |       |          |    |          |                                     |          |         |          |         | -4.45  |    |                                   |          |                   |        |                                  |
| Goodwin10    |                                    |          |         |       |          |    |          |                                     |          |         |          |         | -4.32  |    |                                   |          |                   |        |                                  |
| Goodwin11a   |                                    |          |         |       |          |    |          |                                     |          |         |          |         | -4.26  |    |                                   |          |                   |        |                                  |
| Goodwin12    |                                    |          |         |       |          |    |          |                                     |          |         |          |         | -4.26  |    |                                   |          |                   |        |                                  |
| whitlock24   |                                    |          |         |       |          |    |          |                                     |          |         |          |         | -4.96  |    |                                   |          |                   |        |                                  |
| whitlock25   |                                    |          |         |       |          |    |          |                                     |          |         |          |         | -4.85  |    |                                   |          |                   |        |                                  |
| whitlock26   |                                    |          |         |       |          |    |          |                                     |          |         |          |         | -4.82  |    |                                   |          |                   |        |                                  |
| whitlock28   |                                    |          |         |       |          |    |          |                                     |          |         |          |         | -5.00  |    |                                   |          |                   |        |                                  |
| whitlock30   |                                    |          |         |       |          |    |          |                                     |          |         |          |         | -4.85  |    |                                   |          |                   |        |                                  |
| whitlock34   |                                    |          |         |       |          |    |          |                                     |          |         |          |         | -4.72  |    |                                   |          |                   |        |                                  |
| whitlock35   |                                    |          |         |       |          |    |          |                                     |          |         |          |         | -5.57  |    |                                   |          |                   |        |                                  |
| whitlock36   |                                    |          |         |       |          |    |          |                                     |          |         |          |         | -5.66  |    |                                   |          |                   |        |                                  |
| Li01         |                                    |          |         |       |          |    |          |                                     |          |         |          |         | -5.18  |    |                                   |          | -5.27             |        |                                  |
| Li02         |                                    |          |         |       |          |    |          |                                     |          |         |          |         | -5.21  |    |                                   |          | -5.39             |        |                                  |
| Li03         |                                    |          |         |       |          |    |          |                                     |          |         |          |         | -4.52  |    |                                   |          | -5.33             |        |                                  |
| Li04         |                                    |          |         |       |          |    |          |                                     |          |         |          |         | -4.82  |    |                                   |          | -5.70             |        |                                  |
| Li05         |                                    |          |         |       |          |    |          |                                     |          |         |          |         | -4.90  |    |                                   |          | -5.96             |        |                                  |
| Li06         |                                    |          |         |       |          |    |          |                                     |          |         |          |         | -5.07  |    |                                   |          | -5.57             |        |                                  |
| Li12         |                                    |          |         |       |          |    |          |                                     |          |         |          |         | -4.27  |    |                                   |          | -5.43             |        |                                  |
| Li15         |                                    |          |         |       |          |    |          |                                     |          |         |          |         | -5.51  |    |                                   |          | -6.28             |        |                                  |
| Li16         |                                    |          |         |       |          |    |          |                                     |          |         |          |         | -4.53  |    |                                   |          | -5.51             |        |                                  |
| Li17         |                                    |          |         |       |          |    |          |                                     |          |         |          |         | -4.35  |    |                                   |          | -5.44             |        |                                  |
| Li18         |                                    |          |         |       |          |    |          |                                     |          |         |          |         | -4.49  |    |                                   |          | -4.93             |        |                                  |
| Li19         |                                    |          |         |       |          |    |          |                                     |          |         |          |         | -4.19  |    |                                   |          | -4.93             |        |                                  |
| Li20         |                                    |          |         |       |          |    |          |                                     |          |         |          |         | -4.49  |    |                                   |          | -5.32             |        |                                  |
| Li21         |                                    |          |         |       |          |    |          |                                     |          |         |          |         | -4.35  |    |                                   |          | -5.35             |        |                                  |
| Li22         |                                    |          |         |       |          |    |          |                                     |          |         |          |         | -5.01  |    |                                   |          | -5.15             |        |                                  |
| Li23         |                                    |          |         |       |          |    |          |                                     |          |         |          |         | -4.82  |    |                                   |          | -5.39             |        |                                  |
| Li24         |                                    |          |         |       |          |    |          |                                     |          |         |          |         | -7.00  |    |                                   |          | -6.52             |        |                                  |
| Li27         |                                    |          |         |       |          |    |          |                                     |          |         |          |         | -5.92  |    |                                   |          | -5.89             |        |                                  |
| Li28         |                                    |          |         |       |          |    |          |                                     |          |         |          |         | -7.15  |    |                                   |          | -7.00             |        |                                  |
| Li29         |                                    |          |         |       |          |    |          |                                     |          |         |          |         | -7.00  |    |                                   |          | -6.70             |        |                                  |
| Li30         |                                    |          |         |       |          |    |          |                                     |          |         |          |         | -7.05  |    |                                   |          | -5.70             |        |                                  |
| Li31         |                                    |          |         |       |          |    |          |                                     |          |         |          |         | -6.85  |    |                                   |          | -5.30             |        |                                  |

| Molecule | Log $P_{\text{PAMPA}}$ <sup>a</sup> |          |         |    |          |       |          | Log $P_{\text{Caco-2}}$ <sup>b</sup> |          |         |          |         |        | Log $P_{\text{MDCK}}$ <sup>c</sup> | %Abs <sup>d</sup> |          | Log $P_{\text{app}}$ <sup>e</sup> |
|----------|-------------------------------------|----------|---------|----|----------|-------|----------|--------------------------------------|----------|---------|----------|---------|--------|------------------------------------|-------------------|----------|-----------------------------------|
|          | Avdeef                              | Balimane | Bermejo | Di | Fujikawa | Li    | Whitlock | Avdeef                               | Balimane | Bermejo | Fujikawa | Goodwin | Irvine | Li                                 | Irvine            | Balimane | Irvine                            |
| Li32     |                                     |          |         |    |          | -6.38 |          |                                      |          |         |          |         |        | -5.28                              |                   |          |                                   |
| Li33     |                                     |          |         |    |          | -6.11 |          |                                      |          |         |          |         |        | -6.30                              |                   |          |                                   |
| Li34     |                                     |          |         |    |          | -7.15 |          |                                      |          |         |          |         |        | -5.42                              |                   |          |                                   |

<sup>a</sup> Logarithms of PAMPA measurements (cm/s). Avdeef: Ref. 1; Balimane: Ref. 2; Bermejo: Ref. 3; Di: Ref. 4; Fujikawa: Ref. 5; Li: Ref. 8; Whitlock: Ref. 9.

<sup>b</sup> Logarithms of Caco-2 cell-based assay measurements (cm/s). Avdeef: Ref. 1; Balimane: Ref. 2; Bermejo: Ref. 3; Fujikawa: Ref. 5; Goodwin: Ref. 6; Irvine: Ref. 7; Li: Ref. 8.

<sup>c</sup> Logarithms of MDCK cell-based assay measurements (cm/s). Irvine: Ref. 7.

<sup>d</sup> Percentage fraction absorbed in humans (%). Balimane: Ref. 2; Irvine: Ref. 7.

<sup>e</sup> Logarithms of rat *in situ* perfusion assay measurement (cm/s). Bermejo: Ref. 3.

**Table S2.** Predictions and compound classification of examined data sets.

| Molecule                 | Physics-based <sup>a</sup>        |                              |                        |                           |                        |                          |           | QikProp <sup>b</sup> |         |        |                       |             |             |        | Classification   |                     |                      |
|--------------------------|-----------------------------------|------------------------------|------------------------|---------------------------|------------------------|--------------------------|-----------|----------------------|---------|--------|-----------------------|-------------|-------------|--------|------------------|---------------------|----------------------|
|                          | $\Delta G_{\text{transfer(LDC)}}$ | $\Delta G_{\text{transfer}}$ | $\Delta G_{\text{cw}}$ | $\Delta G_{\text{state}}$ | $\Delta G_{\text{ef}}$ | Log $K_{\text{barrier}}$ | Log $P_m$ | MW                   | Vol     | PSA    | QPlog $P_{\text{ow}}$ | Log QPPCaco | Log QPPMDCK | QP%HOA | PGP <sup>c</sup> | Active <sup>d</sup> | QikProp <sup>e</sup> |
| 2,4-dichlorophenol       | 3.62                              | 3.32                         | 5.23                   | 0.04                      | 1.57                   | -4.88                    | -7.48     | 163.00               | 488.78  | 21.61  | 2.83                  | 3.54        | 4.00        | 100.00 |                  |                     |                      |
| 2,4-dimethylphenol       | 3.06                              | 2.61                         | 4.84                   | 0.00                      | 1.77                   | -4.66                    | -7.27     | 122.17               | 519.70  | 21.41  | 2.22                  | 3.57        | 3.31        | 100.00 |                  |                     |                      |
| 2,5-dichloronitrobenzene | 0.35                              | 0.14                         | 2.33                   | 0.00                      | 1.97                   | -2.86                    | -5.48     | 192.00               | 535.18  | 43.27  | 2.94                  | 3.15        | 3.57        | 100.00 |                  |                     |                      |
| 2-chloroaniline          | 3.51                              | 3.43                         | 5.53                   | 0.00                      | 2.02                   | -5.02                    | -7.61     | 127.57               | 449.56  | 24.80  | 1.82                  | 3.48        | 3.58        | 100.00 |                  |                     |                      |
| 2-chlorophenol           | 3.43                              | 3.17                         | 5.05                   | 0.02                      | 1.60                   | -4.65                    | -7.24     | 128.56               | 444.75  | 21.62  | 2.39                  | 3.54        | 3.65        | 100.00 |                  |                     |                      |
| 2-methylphenol           | 3.60                              | 2.97                         | 5.30                   | 0.00                      | 1.70                   | -4.87                    | -7.47     | 108.14               | 459.75  | 21.41  | 1.94                  | 3.57        | 3.31        | 100.00 |                  |                     |                      |
| 2-nitroaniline           | 3.72                              | 3.60                         | 5.46                   | 0.00                      | 1.75                   | -5.03                    | -7.63     | 138.13               | 477.31  | 67.55  | 1.38                  | 2.66        | 2.32        | 82.59  |                  |                     |                      |
| 2-nitrophenol            | 3.52                              | 3.46                         | 5.41                   | 0.19                      | 1.70                   | -4.98                    | -7.58     | 139.11               | 472.48  | 64.37  | 1.87                  | 2.71        | 2.38        | 86.36  |                  |                     |                      |
| 3-chloroaniline          | 3.42                              | 3.24                         | 5.22                   | 0.00                      | 1.80                   | -4.79                    | -7.39     | 127.57               | 452.41  | 25.88  | 1.81                  | 3.42        | 3.54        | 100.00 |                  |                     |                      |
| 3-nitroaniline           | 3.48                              | 3.38                         | 5.21                   | 0.00                      | 1.74                   | -4.85                    | -7.45     | 138.13               | 480.88  | 70.81  | 1.28                  | 2.50        | 2.15        | 79.18  |                  |                     |                      |
| 3-nitrophenol            | 3.95                              | 3.54                         | 5.65                   | 0.02                      | 1.69                   | -5.16                    | -7.76     | 139.11               | 475.81  | 67.50  | 1.91                  | 2.55        | 2.21        | 83.85  |                  |                     |                      |
| 4-chloroaniline          | 3.40                              | 3.16                         | 5.16                   | 0.00                      | 1.76                   | -4.75                    | -7.34     | 127.57               | 452.28  | 25.84  | 1.88                  | 3.42        | 3.54        | 100.00 |                  |                     |                      |
| 4-cyanophenol            | 4.03                              | 3.56                         | 5.88                   | 0.04                      | 1.81                   | -5.32                    | -7.91     | 119.12               | 468.59  | 48.35  | 1.60                  | 2.79        | 2.47        | 86.32  |                  |                     |                      |
| 4-nitroaniline           | 3.56                              | 3.38                         | 5.17                   | 0.00                      | 1.61                   | -4.82                    | -7.43     | 138.13               | 481.15  | 70.87  | 1.58                  | 2.50        | 2.15        | 80.87  |                  |                     |                      |
| Acetabutoalol            | 6.81                              | 5.92                         | 10.92                  | 2.32                      | 1.79                   | -10.56                   | -13.30    | 336.43               | 1231.46 | 104.25 | 1.71                  | 2.09        | 1.75        | 74.31  | Y                |                     | Y                    |
| Acetaminophen            | 9.06                              | 8.57                         | 10.74                  | 0.00                      | 1.69                   | -9.09                    | -11.72    | 151.17               | 571.14  | 61.23  | 0.51                  | 2.93        | 2.61        | 82.30  |                  |                     | Y                    |
| Acetylsalicylic acid     | 7.83                              | 5.10                         | 13.30                  | 3.86                      | 4.23                   | -11.06                   | -13.70    | 180.16               | 616.59  | 85.10  | 1.19                  | 2.09        | 1.82        | 71.38  |                  |                     | Y                    |
| Acrivastine              | 5.81                              | 5.46                         | 14.32                  | 6.59                      | 1.93                   | -13.10                   | -15.83    | 348.44               | 1218.87 | 67.45  | 2.39                  | 1.63        | 1.36        | 70.10  |                  |                     | Y                    |
| Acyclovir                | 19.09                             | 18.69                        | 21.09                  | 0.00                      | 2.01                   | -16.98                   | -19.64    | 225.21               | 720.44  | 128.43 | -1.56                 | 1.66        | 1.24        | 47.46  |                  |                     | Y                    |
| Aldosterone              | 6.94                              | 5.44                         | 8.83                   | 0.00                      | 1.89                   | -8.80                    | -11.52    | 360.45               | 1090.60 | 118.05 | 1.08                  | 2.11        | 1.73        | 70.94  | Y                |                     |                      |
| Alfentanil               | 2.46                              | 2.37                         | 8.91                   | 4.07                      | 2.39                   | -9.48                    | -12.24    | 416.52               | 1376.46 | 101.07 | 2.15                  | 2.28        | 1.96        | 80.28  |                  |                     | Y                    |
| Alprazolam               | 5.58                              | 5.33                         | 7.34                   | 0.03                      | 1.72                   | -7.41                    | -10.11    | 308.77               | 949.63  | 50.86  | 4.09                  | 3.26        | 3.37        | 100.00 |                  |                     |                      |
| Alprenolol               | 0.80                              | 0.56                         | 4.76                   | 2.32                      | 1.64                   | -5.51                    | -8.21     | 249.35               | 984.65  | 39.81  | 3.10                  | 2.97        | 2.71        | 100.00 | N                |                     | Y                    |
| Amiloride                | 21.62                             | 21.21                        | 27.07                  | 3.98                      | 1.46                   | -21.28                   | -23.93    | 229.63               | 670.86  | 166.40 | -0.82                 | 0.89        | 0.79        | 25.14  |                  | Y                   |                      |
| Aminopyrine              | 4.53                              | 4.24                         | 6.71                   | 0.00                      | 2.18                   | -6.69                    | -9.37     | 231.30               | 829.41  | 35.35  | 1.00                  | 3.07        | 2.81        | 87.73  |                  |                     | Y                    |
| Amoxicillin              | 24.26                             | 22.96                        | 32.87                  | 6.02                      | 2.58                   | -26.30                   | -29.01    | 365.40               | 1067.63 | 159.12 | -2.27                 | -0.17       | 0.14        | 10.60  |                  | Y                   | Y                    |
| Aniline                  | 2.86                              | 2.75                         | 4.67                   | 0.00                      | 1.81                   | -4.30                    | -6.88     | 93.13                | 408.26  | 25.86  | 0.93                  | 3.42        | 3.15        | 93.61  |                  |                     | Y                    |
| Antipyrine               | 3.84                              | 3.68                         | 5.68                   | 0.00                      | 1.84                   | -5.64                    | -8.30     | 188.23               | 689.27  | 35.20  | 0.38                  | 3.50        | 3.23        | 91.80  | N                |                     | Y                    |
| Astemizole               | 5.17                              | 3.49                         | 10.55                  | 2.84                      | 2.54                   | -10.77                   | -13.53    | 458.58               | 1418.42 | 36.41  | 6.14                  | 3.23        | 3.13        | 100.00 | Y                |                     |                      |
| Atenolol                 | 7.09                              | 6.80                         | 11.28                  | 2.32                      | 1.86                   | -10.33                   | -13.03    | 266.34               | 977.17  | 94.87  | 0.17                  | 1.54        | 1.54        | 55.43  | N                | Y                   | Y                    |
| Atrazine                 | 13.71                             | 13.68                        | 15.17                  | 0.00                      | 1.46                   | -12.75                   | -15.42    | 215.69               | 765.07  | 56.04  | 2.61                  | 3.42        | 3.57        | 100.00 | N                |                     |                      |
| AZT                      | 10.07                             | 9.55                         | 11.30                  | 0.00                      | 1.22                   | -10.04                   | -12.72    | 267.24               | 828.46  | 152.32 | 0.03                  | 1.48        | 1.05        | 53.61  |                  |                     | Y                    |
| Benthiocarb              | 0.01                              | -0.22                        | 2.54                   | 0.00                      | 2.53                   | -3.75                    | -6.44     | 257.78               | 875.80  | 28.24  | 3.24                  | 3.71        | 3.94        | 100.00 |                  |                     |                      |
| Biphenyl                 | -1.19                             | -1.89                        | 0.84                   | 0.00                      | 2.03                   | -1.93                    | -4.57     | 154.21               | 610.67  | 0.00   | 4.09                  | 4.00        | 3.77        | 100.00 |                  |                     | Y                    |
| BPMC                     | 1.44                              | 1.17                         | 3.47                   | 0.00                      | 2.03                   | -4.19                    | -6.86     | 207.27               | 767.43  | 42.60  | 2.06                  | 3.59        | 3.33        | 100.00 |                  |                     |                      |
| Bu-ciprofloxacin         | 6.49                              | 6.06                         | 10.54                  | 2.20                      | 1.85                   | -10.37                   | -13.11    | 387.45               | 1249.57 | 87.49  | 1.55                  | 1.38        | 1.24        | 60.62  |                  |                     |                      |
| Bu-norfloxacin           | 6.71                              | 6.13                         | 10.81                  | 2.20                      | 1.90                   | -10.51                   | -13.24    | 375.44               | 1213.40 | 87.19  | 1.31                  | 1.37        | 1.22        | 59.03  |                  |                     |                      |
| Bupropion                | 0.64                              | 0.64                         | 2.15                   | 1.28                      | 0.23                   | -3.37                    | -6.06     | 239.74               | 829.00  | 30.60  | 3.02                  | 3.09        | 3.22        | 100.00 |                  |                     | Y                    |
| Caffeine                 | 10.09                             | 10.09                        | 10.09                  | 0.00                      | 0.00                   | -8.79                    | -11.43    | 194.19               | 650.86  | 74.52  | -0.07                 | 3.01        | 2.71        | 80.49  |                  |                     | Y                    |
| Cefatrizine              | 29.36                             | 26.80                        | 36.52                  | 5.48                      | 1.68                   | -29.26                   | -31.99    | 462.50               | 1278.63 | 204.28 | -1.97                 | -0.87       | -0.78       | 0.00   |                  | Y                   | Y                    |
| Cefuroxime               | 22.05                             | 21.47                        | 28.40                  | 4.99                      | 1.35                   | -23.31                   | -26.04    | 424.38               | 1194.47 | 201.74 | 0.06                  | 0.48        | 0.19        | 22.94  |                  |                     | Y                    |
| Cephalexin               | 20.25                             | 19.70                        | 28.09                  | 4.91                      | 2.93                   | -22.81                   | -25.52    | 347.39               | 1046.05 | 135.42 | -1.09                 | 0.59        | 0.68        | 31.22  |                  | Y                   | Y                    |
| Chloramphenicol          | 8.06                              | 7.50                         | 9.98                   | 0.00                      | 1.92                   | -9.24                    | -11.93    | 323.13               | 876.97  | 119.68 | 1.08                  | 1.87        | 2.24        | 66.64  |                  |                     | Y                    |
| Chlorothiazide           | 20.68                             | 20.04                        | 22.83                  | 0.00                      | 2.15                   | -18.30                   | -20.96    | 295.72               | 722.96  | 128.71 | -0.42                 | 1.51        | 1.37        | 51.42  |                  |                     | Y                    |

| Molecule                        | Physics-based <sup>a</sup>        |                              |                         |                           |                        |                          |                    |        | QikProp <sup>b</sup> |        |                        |             |             |        |                  | Classification      |                      |  |
|---------------------------------|-----------------------------------|------------------------------|-------------------------|---------------------------|------------------------|--------------------------|--------------------|--------|----------------------|--------|------------------------|-------------|-------------|--------|------------------|---------------------|----------------------|--|
|                                 | $\Delta G_{\text{transfer(LDC)}}$ | $\Delta G_{\text{transfer}}$ | $\Delta G_{\text{c/w}}$ | $\Delta G_{\text{state}}$ | $\Delta G_{\text{cf}}$ | Log $K_{\text{barrier}}$ | Log $P_{\text{m}}$ | MW     | Vol                  | PSA    | QPlog $P_{\text{c/w}}$ | Log QPPCaco | Log QPPMDCK | QP%HOA | PGP <sup>c</sup> | Active <sup>d</sup> | QikProp <sup>e</sup> |  |
| Chlorpromazine                  | 2.47                              | 2.30                         | 7.94                    | 2.95                      | 2.51                   | -8.01                    | -10.72             | 318.86 | 993.36               | 6.84   | 5.08                   | 3.38        | 3.71        | 100.00 | Y                | Y                   | Y                    |  |
| Cimetidine                      | 10.22                             | 9.71                         | 12.36                   | 0.47                      | 1.67                   | -10.86                   | -13.55             | 252.34 | 896.19               | 99.00  | 0.42                   | 2.36        | 2.14        | 71.58  | Y                | Y                   | Y                    |  |
| Ciprofloxacin                   | 9.85                              | 9.67                         | 15.80                   | 3.43                      | 2.52                   | -13.74                   | -16.45             | 331.35 | 1003.64              | 97.63  | 0.28                   | 1.11        | 0.98        | 48.44  |                  | Y                   |                      |  |
| Clobazam                        | 7.40                              | 7.16                         | 9.17                    | 0.09                      | 1.68                   | -8.68                    | -11.38             | 300.74 | 914.34               | 56.27  | 2.21                   | 3.22        | 3.32        | 100.00 |                  |                     |                      |  |
| Clonidine                       | 10.31                             | 10.04                        | 12.31                   | 0.25                      | 1.75                   | -10.51                   | -13.17             | 230.10 | 695.43               | 37.12  | 1.59                   | 3.50        | 3.91        | 100.00 | N                |                     | Y                    |  |
| CNV97100                        | 9.66                              | 9.07                         | 15.88                   | 3.86                      | 2.36                   | -13.92                   | -16.64             | 345.37 | 1103.90              | 96.31  | 0.46                   | 1.20        | 1.04        | 51.11  |                  |                     |                      |  |
| CNV97101                        | 8.43                              | 8.16                         | 12.96                   | 2.11                      | 2.42                   | -11.89                   | -14.61             | 359.40 | 1110.87              | 87.65  | 0.60                   | 1.35        | 1.20        | 54.69  |                  |                     |                      |  |
| CNV97102                        | 7.94                              | 7.31                         | 12.44                   | 2.25                      | 2.25                   | -11.61                   | -14.34             | 373.43 | 1160.12              | 87.00  | 0.95                   | 1.37        | 1.22        | 56.98  |                  |                     |                      |  |
| CNV97103                        | 6.55                              | 6.26                         | 11.24                   | 2.28                      | 2.42                   | -10.88                   | -13.62             | 387.45 | 1227.50              | 87.10  | 1.40                   | 1.39        | 1.24        | 59.96  |                  |                     |                      |  |
| CNV97104                        | 5.51                              | 5.23                         | 10.12                   | 2.33                      | 2.27                   | -10.18                   | -12.92             | 401.48 | 1288.40              | 87.10  | 1.80                   | 1.39        | 1.24        | 62.34  |                  |                     |                      |  |
| Corticosterone                  | 4.29                              | 4.02                         | 6.53                    | 0.00                      | 2.25                   | -7.09                    | -9.81              | 346.47 | 1084.31              | 92.79  | 1.94                   | 2.42        | 2.06        | 81.54  | Y                |                     | Y                    |  |
| Coumarin                        | 2.27                              | 2.27                         | 2.27                    | 0.00                      | 0.00                   | -2.76                    | -5.37              | 146.15 | 515.02               | 40.60  | 1.39                   | 3.31        | 3.03        | 94.31  |                  |                     |                      |  |
| Desipramine                     | 3.42                              | 2.90                         | 9.25                    | 3.78                      | 2.05                   | -8.84                    | -11.55             | 266.39 | 968.23               | 16.08  | 4.89                   | 3.16        | 2.91        | 100.00 | N                |                     | Y                    |  |
| Dexamethasone                   | 7.61                              | 6.39                         | 10.13                   | 0.00                      | 2.52                   | -9.85                    | -12.58             | 392.47 | 1141.06              | 107.15 | 1.94                   | 2.28        | 2.00        | 79.10  | Y                |                     | Y                    |  |
| Diazepam                        | 3.73                              | 3.52                         | 5.52                    | 0.00                      | 1.79                   | -5.96                    | -8.66              | 284.74 | 897.29               | 47.08  | 2.99                   | 3.43        | 3.55        | 100.00 |                  |                     | Y                    |  |
| Diazinon                        | 7.50                              | 6.90                         | 9.95                    | 0.00                      | 2.46                   | -9.42                    | -12.13             | 288.28 | 972.75               | 62.40  | 2.02                   | 3.65        | 3.41        | 100.00 |                  |                     |                      |  |
| Diethylphthalate                | 0.19                              | 0.13                         | 3.21                    | 0.00                      | 3.03                   | -4.13                    | -6.82              | 222.24 | 818.09               | 64.47  | 2.31                   | 3.22        | 2.93        | 100.00 |                  |                     |                      |  |
| Diltiazem                       | 3.41                              | 2.99                         | 8.37                    | 2.41                      | 2.65                   | -8.89                    | -11.63             | 414.52 | 1283.05              | 69.15  | 3.00                   | 2.72        | 2.58        | 93.15  | Y                |                     |                      |  |
| Dimethylphthalate               | 1.65                              | 1.48                         | 3.58                    | 0.00                      | 1.93                   | -4.12                    | -6.78              | 194.19 | 695.01               | 65.98  | 1.46                   | 3.17        | 2.87        | 92.16  |                  |                     |                      |  |
| Diphenylamine                   | 6.24                              | 5.63                         | 12.46                   | 4.09                      | 2.13                   | -10.71                   | -13.37             | 169.23 | 654.29               | 9.90   | 3.50                   | 3.92        | 3.69        | 100.00 |                  |                     |                      |  |
| Diphenylamine-2-carboxylic acid | 1.77                              | 1.28                         | 3.47                    | 0.00                      | 1.70                   | -3.94                    | -6.59              | 213.24 | 726.38               | 56.35  | 4.20                   | 2.48        | 2.24        | 95.89  |                  |                     |                      |  |
| DMTP                            | 4.99                              | 4.29                         | 7.01                    | 0.00                      | 2.02                   | -6.88                    | -9.56              | 302.32 | 826.02               | 70.44  | 2.47                   | 3.52        | 4.00        | 100.00 |                  |                     |                      |  |
| Dopamine                        | 9.23                              | 8.86                         | 14.36                   | 2.86                      | 2.28                   | -11.76                   | -14.39             | 153.18 | 572.50               | 70.70  | -0.98                  | 1.83        | 1.48        | 54.04  |                  |                     | Y                    |  |
| Enoxacin                        | 11.81                             | 11.40                        | 17.87                   | 3.35                      | 2.87                   | -15.15                   | -17.85             | 320.32 | 966.45               | 103.60 | -0.20                  | 1.09        | 0.94        | 45.33  |                  |                     |                      |  |
| Estradiol                       | 3.28                              | 2.85                         | 5.01                    | 0.00                      | 1.74                   | -5.62                    | -8.31              | 272.39 | 911.58               | 43.70  | 4.01                   | 3.09        | 2.79        | 100.00 | Y                |                     | Y                    |  |
| Etoposide                       | 15.77                             | 14.04                        | 17.66                   | 0.00                      | 1.89                   | -16.23                   | -19.00             | 588.56 | 1502.71              | 164.52 | 0.60                   | 2.47        | 2.12        | 48.73  | Y                |                     |                      |  |
| Fenaterol                       | 13.93                             | 12.14                        | 16.77                   | 2.63                      | 0.20                   | -14.50                   | -17.21             | 303.36 | 1028.53              | 100.70 | 1.05                   | 1.38        | 0.99        | 57.76  |                  | Y                   |                      |  |
| Flumequine                      | 6.80                              | 6.63                         | 10.07                   | 1.73                      | 1.53                   | -9.08                    | -11.76             | 261.25 | 795.35               | 79.55  | 2.58                   | 2.01        | 1.98        | 78.00  |                  |                     |                      |  |
| Fluparoxan                      | 4.49                              | 4.49                         | 5.45                    | 0.96                      | 0.00                   | -5.31                    | -7.94              | 195.19 | 612.32               | 33.79  | 1.47                   | 3.07        | 3.06        | 90.57  |                  |                     | Y                    |  |
| Furosemide                      | 14.16                             | 13.79                        | 21.81                   | 3.84                      | 3.81                   | -17.93                   | -20.63             | 330.74 | 904.54               | 128.99 | 1.86                   | 1.21        | 1.16        | 59.57  |                  | Y                   | Y                    |  |
| Gabapentin                      | 4.16                              | 4.05                         | 13.72                   | 7.47                      | 2.09                   | -11.40                   | -14.04             | 171.24 | 622.64               | 66.71  | -1.10                  | 1.61        | 1.34        | 49.36  |                  | Y                   | Y                    |  |
| Guanabenz                       | 6.74                              | 6.68                         | 14.19                   | 5.33                      | 2.12                   | -11.87                   | -14.52             | 231.08 | 683.67               | 81.76  | 1.13                   | 2.55        | 2.82        | 79.27  |                  |                     | Y                    |  |
| Hydralazine                     | 10.42                             | 10.07                        | 12.28                   | 0.00                      | 1.86                   | -10.20                   | -12.82             | 160.18 | 553.99               | 68.37  | -0.34                  | 2.03        | 1.69        | 61.30  |                  |                     |                      |  |
| Hydrochlorothiazide             | 19.40                             | 18.94                        | 21.81                   | 0.05                      | 2.36                   | -17.56                   | -20.23             | 297.73 | 731.85               | 130.90 | -0.10                  | 1.50        | 1.37        | 53.21  |                  |                     | Y                    |  |
| Hydrocortisone                  | 8.04                              | 7.28                         | 10.29                   | 0.00                      | 2.24                   | -9.87                    | -12.59             | 362.47 | 1094.96              | 110.47 | 1.60                   | 2.13        | 1.75        | 74.40  | Y                |                     | Y                    |  |
| Hydroquinone                    | 7.46                              | 6.84                         | 9.01                    | 0.00                      | 1.55                   | -7.52                    | -10.10             | 110.11 | 425.79               | 45.07  | 0.80                   | 2.96        | 2.65        | 84.58  |                  |                     |                      |  |
| IBP                             | -0.02                             | -1.40                        | 1.45                    | 0.00                      | 1.47                   | -3.13                    | -5.83              | 288.34 | 979.62               | 31.37  | 3.54                   | 3.74        | 3.67        | 100.00 |                  |                     |                      |  |
| Ibuprofen                       | 0.40                              | -0.12                        | 7.06                    | 4.15                      | 2.50                   | -6.88                    | -9.56              | 206.28 | 799.67               | 48.77  | 3.50                   | 2.51        | 2.27        | 92.37  |                  | Y                   | Y                    |  |
| Imidacloprid                    | 8.06                              | 6.45                         | 12.41                   | 2.07                      | 2.28                   | -10.71                   | -13.38             | 255.66 | 754.09               | 85.65  | 0.93                   | 2.49        | 2.55        | 76.90  |                  |                     |                      |  |
| Imipramine                      | 1.10                              | 0.86                         | 6.77                    | 3.14                      | 2.40                   | -7.15                    | -9.86              | 280.41 | 1017.15              | 6.02   | 4.44                   | 3.37        | 3.14        | 100.00 | N                |                     | Y                    |  |
| Isoxicam                        | 13.87                             | 12.38                        | 15.01                   | 0.00                      | 1.14                   | -13.05                   | -15.76             | 335.33 | 971.26               | 117.52 | 1.43                   | 2.22        | 1.86        | 75.08  |                  |                     |                      |  |
| Ketoconazole                    | 5.54                              | 4.44                         | 7.38                    | 0.27                      | 1.57                   | -8.51                    | -11.28             | 531.44 | 1565.83              | 69.08  | 4.36                   | 2.94        | 3.58        | 92.10  | Y                |                     |                      |  |
| Ketoprofen                      | 3.95                              | 3.26                         | 11.02                   | 4.47                      | 2.60                   | -9.94                    | -12.62             | 254.29 | 872.26               | 75.43  | 3.12                   | 2.10        | 1.83        | 82.88  |                  |                     | Y                    |  |
| Labetalol                       | 11.21                             | 9.78                         | 14.49                   | 2.23                      | 1.06                   | -13.04                   | -15.77             | 328.41 | 1136.31              | 104.68 | 2.87                   | 1.53        | 1.14        | 71.03  | Y                |                     | Y                    |  |
| Lamotrigine                     | 14.64                             | 14.15                        | 16.60                   | 0.01                      | 1.95                   | -13.69                   | -16.35             | 256.09 | 709.84               | 89.72  | 0.95                   | 2.29        | 2.55        | 73.59  |                  |                     | Y                    |  |
| Lisinopril                      | 9.52                              | 9.01                         | 27.68                   | 16.86                     | 1.30                   | -23.17                   | -25.92             | 405.49 | 1312.41              | 154.68 | -1.19                  | -1.01       | -1.11       | 1.88   |                  | Y                   | Y                    |  |
| Lomefloxacin                    | 8.72                              | 8.36                         | 15.86                   | 4.10                      | 3.04                   | -13.85                   | -16.56             | 351.35 | 1036.36              | 95.34  | -0.39                  | 1.20        | 1.10        | 46.20  |                  |                     |                      |  |



| Molecule           | Physics-based <sup>a</sup>        |                              |                         |                           |                        |                          |           |        | QikProp <sup>b</sup> |        |                        |             |             |        | Classification   |                     |                      |
|--------------------|-----------------------------------|------------------------------|-------------------------|---------------------------|------------------------|--------------------------|-----------|--------|----------------------|--------|------------------------|-------------|-------------|--------|------------------|---------------------|----------------------|
|                    | $\Delta G_{\text{transfer(LDC)}}$ | $\Delta G_{\text{transfer}}$ | $\Delta G_{\text{c/w}}$ | $\Delta G_{\text{state}}$ | $\Delta G_{\text{cf}}$ | Log $K_{\text{barrier}}$ | Log $P_m$ | MW     | Vol                  | PSA    | QPlog $P_{\text{c/w}}$ | Log QPPCaco | Log QPPMDCK | QP%HOA | PGP <sup>c</sup> | Active <sup>d</sup> | QikProp <sup>e</sup> |
| Loracarbef         | 15.15                             | 14.63                        | 23.89                   | 5.99                      | 2.75                   | -19.71                   | -22.42    | 349.77 | 1023.93              | 135.79 | -1.16                  | 0.61        | 0.82        | 31.11  |                  | Y                   | Y                    |
| Mannitol           | 13.88                             | 13.33                        | 14.71                   | 0.00                      | 0.83                   | -12.07                   | -14.70    | 182.17 | 602.16               | 121.16 | -3.08                  | 1.73        | 1.32        | 26.92  |                  |                     | Y                    |
| Me-ciprofloxacin   | 9.13                              | 8.88                         | 13.42                   | 2.01                      | 2.32                   | -12.12                   | -14.83    | 345.37 | 1071.08              | 88.14  | 0.33                   | 1.34        | 1.19        | 52.84  |                  |                     |                      |
| Me-norfloxacin     | 9.67                              | 9.01                         | 14.28                   | 2.01                      | 2.60                   | -12.68                   | -15.39    | 333.36 | 1035.63              | 87.83  | 0.27                   | 1.33        | 1.18        | 52.26  |                  |                     |                      |
| MEP                | 1.21                              | 0.75                         | 3.84                    | 0.00                      | 2.62                   | -4.59                    | -7.27     | 277.23 | 821.26               | 64.16  | 3.27                   | 3.17        | 3.25        | 100.00 |                  |                     |                      |
| Metformin          | 14.21                             | 14.21                        | 15.95                   | 1.74                      | 0.00                   | -12.78                   | -15.39    | 129.16 | 506.32               | 93.16  | -0.80                  | 2.29        | 1.92        | 63.20  |                  | Y                   |                      |
| Methoxyfenozide    | 3.40                              | 2.88                         | 6.61                    | 0.00                      | 3.33                   | -7.50                    | -10.24    | 368.48 | 1242.27              | 63.27  | 4.92                   | 3.54        | 3.28        | 100.00 |                  |                     |                      |
| Methylprednisolone | 7.71                              | 7.08                         | 10.32                   | 0.00                      | 2.60                   | -9.97                    | -12.70    | 374.48 | 1130.95              | 111.49 | 1.61                   | 2.10        | 1.72        | 73.96  |                  |                     | Y                    |
| Metoprolol         | 1.44                              | 1.02                         | 5.74                    | 2.32                      | 1.98                   | -6.36                    | -9.07     | 267.37 | 1023.93              | 48.98  | 1.88                   | 2.93        | 2.67        | 90.48  | N                |                     | Y                    |
| Nadolol            | 8.09                              | 7.30                         | 12.47                   | 2.70                      | 1.68                   | -11.43                   | -14.15    | 309.41 | 988.40               | 80.30  | 0.77                   | 2.25        | 1.93        | 71.66  |                  |                     | Y                    |
| Naproxen           | 3.96                              | 3.32                         | 10.87                   | 4.21                      | 2.70                   | -9.66                    | -12.33    | 230.26 | 788.16               | 57.05  | 3.18                   | 2.51        | 2.27        | 90.52  |                  |                     | Y                    |
| Netivudine         | 16.63                             | 16.00                        | 17.81                   | 0.02                      | 1.16                   | -14.91                   | -17.60    | 282.25 | 869.26               | 142.60 | -1.15                  | 1.64        | 1.23        | 49.60  |                  |                     | Y                    |
| Norfloxacin        | 9.95                              | 9.65                         | 16.47                   | 3.43                      | 3.09                   | -14.16                   | -16.86    | 319.34 | 976.08               | 96.95  | -1.02                  | 1.12        | 0.96        | 40.98  |                  |                     |                      |
| Ofloxacin          | 10.94                             | 10.50                        | 14.39                   | 2.11                      | 1.34                   | -12.83                   | -15.55    | 361.37 | 1067.86              | 92.79  | -0.39                  | 1.34        | 1.22        | 48.65  |                  | Y                   |                      |
| Olsalazine         | 18.92                             | 18.47                        | 35.73                   | 14.32                     | 2.50                   | -28.13                   | -30.82    | 302.24 | 896.26               | 168.28 | 1.15                   | -0.19       | -0.55       | 30.23  |                  |                     | Y                    |
| Ondansetron        | 2.67                              | 2.31                         | 4.08                    | 0.31                      | 1.10                   | -5.10                    | -7.80     | 293.37 | 982.18               | 43.78  | 3.94                   | 3.50        | 3.23        | 100.00 |                  |                     | Y                    |
| Oxazepam           | 8.95                              | 8.53                         | 10.95                   | 0.00                      | 2.01                   | -9.88                    | -12.56    | 286.72 | 863.32               | 78.30  | 2.24                   | 2.73        | 2.80        | 88.99  |                  |                     | Y                    |
| Oxprenolol         | 2.34                              | 1.22                         | 6.31                    | 2.32                      | 1.65                   | -6.75                    | -9.45     | 265.35 | 1005.22              | 47.11  | 2.18                   | 2.94        | 2.68        | 92.43  | Y                |                     | Y                    |
| Penicillin V       | 15.84                             | 15.28                        | 24.61                   | 5.91                      | 2.87                   | -20.19                   | -22.90    | 350.39 | 1064.80              | 123.72 | 2.08                   | 1.09        | 1.47        | 58.61  |                  |                     | Y                    |
| Phenol             | 3.39                              | 2.93                         | 5.16                    | 0.00                      | 1.77                   | -4.64                    | -7.22     | 94.11  | 403.16               | 22.54  | 1.46                   | 3.48        | 3.21        | 100.00 |                  |                     | Y                    |
| Phenytoin          | 6.98                              | 6.80                         | 8.91                    | 0.00                      | 1.93                   | -8.27                    | -10.95    | 252.27 | 815.57               | 71.24  | 2.27                   | 2.73        | 2.41        | 89.14  | Y                |                     | Y                    |
| Pindolol           | 7.50                              | 7.04                         | 11.36                   | 2.32                      | 1.54                   | -10.25                   | -12.95    | 248.32 | 890.05               | 51.56  | 1.84                   | 2.82        | 2.54        | 88.18  |                  |                     | Y                    |
| Pirenzepine        | 12.07                             | 11.87                        | 13.62                   | 0.55                      | 1.00                   | -12.30                   | -15.03    | 351.41 | 1113.32              | 85.80  | 0.10                   | 1.74        | 1.42        | 58.69  |                  |                     | Y                    |
| Piroxicam          | 14.15                             | 12.15                        | 17.11                   | 1.50                      | 1.47                   | -14.59                   | -17.29    | 331.35 | 954.65               | 108.08 | 0.50                   | 2.60        | 2.26        | 76.31  |                  |                     | Y                    |
| Practolol          | 7.29                              | 7.27                         | 11.43                   | 2.32                      | 1.83                   | -10.48                   | -13.18    | 373.43 | 1189.07              | 87.49  | 1.15                   | 1.38        | 1.24        | 58.33  |                  |                     | Y                    |
| Pr-ciprofloxacin   | 7.42                              | 7.02                         | 12.04                   | 2.15                      | 2.48                   | -11.35                   | -14.08    | 361.42 | 1152.81              | 87.19  | 0.85                   | 1.37        | 1.22        | 56.37  |                  |                     |                      |
| Prednisolone       | 8.74                              | 7.78                         | 10.94                   | 0.00                      | 2.20                   | -10.34                   | -13.06    | 266.34 | 994.29               | 79.77  | 1.86                   | 2.36        | 2.04        | 80.04  | N                |                     | Y                    |
| Pr-norfloxacin     | 7.28                              | 7.13                         | 12.10                   | 2.15                      | 2.67                   | -11.33                   | -14.06    | 360.45 | 1086.56              | 112.72 | 1.60                   | 2.03        | 1.64        | 72.65  |                  |                     |                      |
| Progesterone       | -2.50                             | -2.62                        | -1.09                   | 0.00                      | 1.41                   | -1.43                    | -4.14     | 314.47 | 1047.88              | 55.16  | 3.86                   | 3.06        | 2.76        | 100.00 | N                |                     | Y                    |
| Promazine          | 2.88                              | 2.51                         | 8.16                    | 2.95                      | 2.32                   | -8.07                    | -10.78    | 284.42 | 949.18               | 9.36   | 4.68                   | 3.38        | 3.32        | 100.00 | Y                |                     |                      |
| Propranolol        | 2.61                              | 2.47                         | 6.27                    | 2.32                      | 1.35                   | -6.63                    | -9.33     | 259.35 | 987.08               | 40.04  | 3.09                   | 2.71        | 2.43        | 93.58  | Y                | Y                   | Y                    |
| Propylthiouracil   | 7.07                              | 6.83                         | 8.62                    | 0.17                      | 1.38                   | -7.61                    | -10.24    | 170.23 | 590.37               | 64.96  | 0.68                   | 3.04        | 3.19        | 85.41  |                  |                     | Y                    |
| Pyrene             | 1.49                              | 1.49                         | 1.49                    | 0.00                      | 0.00                   | -2.57                    | -5.22     | 202.26 | 690.55               | 0.00   | 4.88                   | 4.00        | 3.77        | 100.00 |                  |                     |                      |
| Ranitidine         | 3.85                              | 3.68                         | 12.65                   | 5.83                      | 2.41                   | -11.50                   | -14.21    | 314.40 | 1093.64              | 80.96  | 0.71                   | 2.25        | 2.10        | 71.33  | Y                |                     | Y                    |
| RH5849             | 4.12                              | 3.86                         | 7.52                    | 0.00                      | 3.40                   | -7.66                    | -10.37    | 296.37 | 1001.77              | 59.34  | 3.90                   | 3.48        | 3.21        | 100.00 |                  |                     |                      |
| Salicylic acid     | 8.32                              | 8.12                         | 15.50                   | 5.92                      | 1.26                   | -12.40                   | -15.00    | 138.12 | 482.08               | 69.25  | 2.26                   | 2.03        | 1.76        | 76.59  |                  | Y                   | Y                    |
| Salithion          | 2.24                              | 1.80                         | 4.05                    | 0.00                      | 1.82                   | -4.33                    | -6.98     | 216.19 | 635.61               | 24.60  | 2.15                   | 4.00        | 4.00        | 100.00 |                  |                     |                      |
| Sarafloxacin       | 9.14                              | 8.77                         | 14.93                   | 3.59                      | 2.20                   | -13.33                   | -16.05    | 385.37 | 1113.94              | 96.87  | 1.19                   | 1.11        | 1.23        | 53.73  |                  |                     |                      |
| Sotalol            | 11.37                             | 10.99                        | 17.67                   | 3.99                      | 2.31                   | -14.95                   | -17.65    | 272.36 | 930.79               | 82.81  | 0.24                   | 2.02        | 1.68        | 64.48  |                  |                     | Y                    |
| Sulfasalazine      | 19.85                             | 19.10                        | 30.80                   | 8.51                      | 2.44                   | -25.05                   | -27.78    | 398.39 | 1151.16              | 161.65 | 1.05                   | 0.67        | 0.28        | 45.06  | N                | Y                   | Y                    |
| Sulpiride          | 12.15                             | 11.02                        | 16.72                   | 2.99                      | 1.58                   | -14.58                   | -17.30    | 341.42 | 1081.30              | 111.74 | 0.57                   | 1.62        | 1.25        | 59.24  |                  |                     | Y                    |
| Sumatriptan        | 11.03                             | 10.47                        | 16.15                   | 2.68                      | 2.44                   | -13.94                   | -16.64    | 295.40 | 984.45               | 71.62  | 1.38                   | 2.14        | 1.81        | 73.30  |                  |                     | Y                    |
| Tebufenozide       | 2.07                              | 1.44                         | 5.22                    | 0.00                      | 3.15                   | -6.46                    | -9.20     | 352.48 | 1240.68              | 58.20  | 5.23                   | 3.48        | 3.21        | 100.00 |                  |                     |                      |
| Tenoxicam          | 13.56                             | 13.36                        | 26.26                   | 10.51                     | 2.19                   | -21.20                   | -23.90    | 337.37 | 932.71               | 105.70 | 1.82                   | 2.44        | 2.35        | 81.23  |                  |                     |                      |
| Terbutaline        | 10.07                             | 9.94                         | 15.43                   | 2.77                      | 2.58                   | -13.07                   | -15.75    | 225.29 | 815.30               | 75.10  | 0.09                   | 1.99        | 1.65        | 63.18  |                  |                     | Y                    |
| Testosterone       | -0.32                             | -0.40                        | 1.47                    | 0.00                      | 1.79                   | -3.12                    | -5.83     | 288.43 | 960.67               | 50.76  | 3.32                   | 3.06        | 2.76        | 100.00 | N                |                     | Y                    |
| Theophylline       | 14.90                             | 14.90                        | 15.23                   | 0.33                      | 0.00                   | -12.43                   | -15.06    | 180.17 | 587.91               | 87.98  | -0.02                  | 2.64        | 2.31        | 74.09  |                  | Y                   |                      |

| Molecule     | Physics-based <sup>a</sup>        |                              |                         |                           |                        |                          |                    | QikProp <sup>b</sup> |         |        |                        |             |             |        | Classification   |                     |                      |
|--------------|-----------------------------------|------------------------------|-------------------------|---------------------------|------------------------|--------------------------|--------------------|----------------------|---------|--------|------------------------|-------------|-------------|--------|------------------|---------------------|----------------------|
|              | $\Delta G_{\text{transfer(LDC)}}$ | $\Delta G_{\text{transfer}}$ | $\Delta G_{\text{c/w}}$ | $\Delta G_{\text{state}}$ | $\Delta G_{\text{cf}}$ | Log $K_{\text{barrier}}$ | Log $P_{\text{m}}$ | MW                   | Vol     | PSA    | QPlog $P_{\text{c/w}}$ | Log QPPCaco | Log QPPMDCK | QP%HOA | PGP <sup>c</sup> | Active <sup>d</sup> | QikProp <sup>e</sup> |
| Thiopental   | 7.40                              | 6.94                         | 9.84                    | 0.56                      | 1.88                   | -8.90                    | -11.57             | 242.34               | 778.28  | 77.37  | 2.05                   | 3.34        | 3.51        | 100.00 |                  |                     |                      |
| Timolol      | 6.37                              | 6.06                         | 10.79                   | 2.84                      | 1.57                   | -10.11                   | -12.82             | 316.42               | 996.29  | 78.38  | 1.83                   | 2.61        | 2.61        | 84.33  |                  |                     | Y                    |
| Trimethoprim | 17.33                             | 15.41                        | 19.80                   | 0.11                      | 2.36                   | -16.49                   | -19.19             | 290.32               | 909.01  | 93.74  | 0.93                   | 2.55        | 2.21        | 77.97  | Y                |                     | Y                    |
| Verapamil    | -2.30                             | -3.07                        | 1.42                    | 2.25                      | 1.47                   | -4.38                    | -7.16              | 454.61               | 1558.61 | 59.61  | 3.80                   | 2.89        | 2.62        | 100.00 | Y                | Y                   | Y                    |
| Warfarin     | 2.73                              | 2.14                         | 6.30                    | 1.29                      | 2.28                   | -6.71                    | -9.42              | 308.33               | 982.06  | 78.92  | 2.93                   | 2.97        | 2.66        | 100.00 |                  |                     | Y                    |
| Goodwin01    | 11.55                             | 11.28                        | 14.80                   | 0.00                      | 3.25                   | -12.96                   | -15.67             | 277.32               | 988.97  | 113.05 | 0.25                   | 1.87        | 2.27        | 61.84  |                  |                     |                      |
| Goodwin02    | 12.01                             | 10.70                        | 13.58                   | 0.00                      | 1.57                   | -12.02                   | -14.72             | 291.35               | 1046.44 | 109.81 | 0.72                   | 2.05        | 2.44        | 67.90  |                  |                     |                      |
| Goodwin03a   | 10.67                             | 9.42                         | 11.37                   | 0.00                      | 0.70                   | -10.61                   | -13.33             | 319.40               | 1140.82 | 104.00 | 1.50                   | 2.41        | 2.73        | 78.84  |                  |                     |                      |
| Goodwin04    | 9.52                              | 8.23                         | 10.26                   | 0.00                      | 0.75                   | -9.94                    | -12.67             | 333.43               | 1189.84 | 105.79 | 1.74                   | 2.28        | 2.63        | 77.82  |                  |                     |                      |
| Goodwin05a   | 10.90                             | 9.42                         | 12.16                   | 0.00                      | 1.25                   | -11.48                   | -14.21             | 367.45               | 1239.92 | 107.12 | 2.27                   | 2.39        | 2.69        | 83.11  |                  |                     |                      |
| Goodwin06    | 8.25                              | 7.12                         | 9.13                    | 0.00                      | 0.88                   | -9.36                    | -12.10             | 373.49               | 1306.92 | 105.69 | 2.48                   | 2.31        | 2.65        | 82.83  |                  |                     |                      |
| Goodwin07    | 7.03                              | 6.82                         | 10.69                   | 0.00                      | 3.66                   | -9.62                    | -12.31             | 220.27               | 837.37  | 78.94  | 0.93                   | 2.44        | 2.63        | 76.06  |                  |                     |                      |
| Goodwin08    | 6.41                              | 5.94                         | 9.66                    | 0.00                      | 3.25                   | -8.99                    | -11.68             | 234.30               | 896.96  | 75.70  | 1.40                   | 2.60        | 2.78        | 81.60  |                  |                     |                      |
| Goodwin09a   | 5.57                              | 4.35                         | 8.29                    | 0.00                      | 1.96                   | -8.13                    | -10.83             | 262.35               | 989.70  | 70.59  | 2.14                   | 2.84        | 3.01        | 90.39  |                  |                     |                      |
| Goodwin10    | 3.82                              | 3.31                         | 7.05                    | 0.00                      | 3.23                   | -7.41                    | -10.12             | 276.38               | 1051.48 | 71.59  | 2.44                   | 2.71        | 2.90        | 89.71  |                  |                     |                      |
| Goodwin11a   | 7.46                              | 4.73                         | 8.50                    | 0.00                      | 1.03                   | -8.29                    | -10.99             | 310.40               | 1117.47 | 72.82  | 3.08                   | 2.75        | 2.93        | 94.29  |                  |                     |                      |
| Goodwin12    | 3.95                              | 2.34                         | 6.32                    | 0.00                      | 2.37                   | -6.98                    | -9.70              | 316.44               | 1165.50 | 71.62  | 3.17                   | 2.72        | 2.91        | 94.26  |                  |                     |                      |
| whitlock24   | 7.57                              | 7.26                         | 11.90                   | 1.46                      | 2.87                   | -10.84                   | -13.54             | 320.78               | 991.58  | 78.82  | 2.09                   | 2.16        | 2.22        | 77.87  |                  |                     |                      |
| whitlock25   | 6.57                              | 6.05                         | 10.71                   | 1.37                      | 2.77                   | -10.12                   | -12.84             | 334.80               | 1065.98 | 64.67  | 3.08                   | 2.67        | 2.78        | 92.84  |                  |                     |                      |
| whitlock26   | 4.50                              | 3.53                         | 8.51                    | 1.42                      | 2.59                   | -8.61                    | -11.33             | 348.83               | 1116.79 | 55.29  | 3.43                   | 2.83        | 2.94        | 100.00 |                  |                     |                      |
| whitlock28   | 8.29                              | 6.77                         | 11.22                   | 0.98                      | 1.95                   | -10.25                   | -12.95             | 325.19               | 951.35  | 72.94  | 2.32                   | 2.16        | 2.50        | 79.20  |                  |                     |                      |
| whitlock30   | 4.82                              | 3.33                         | 7.70                    | 0.94                      | 1.94                   | -7.94                    | -10.66             | 353.25               | 1073.74 | 49.40  | 3.67                   | 2.83        | 3.22        | 100.00 |                  |                     |                      |
| whitlock34   | 4.25                              | 3.06                         | 8.52                    | 2.30                      | 1.97                   | -8.55                    | -11.27             | 332.83               | 1085.51 | 48.87  | 3.54                   | 2.83        | 2.94        | 100.00 |                  |                     |                      |
| whitlock35   | 8.06                              | 6.98                         | 12.50                   | 2.35                      | 2.09                   | -11.60                   | -14.33             | 380.89               | 1143.26 | 62.62  | 3.06                   | 2.53        | 2.63        | 90.18  |                  |                     |                      |
| whitlock36   | 10.48                             | 9.35                         | 16.53                   | 4.27                      | 1.79                   | -14.42                   | -17.14             | 354.85               | 1081.37 | 70.97  | 2.48                   | 2.38        | 2.47        | 84.13  |                  |                     |                      |
| Li01         | 11.27                             | 9.64                         | 11.69                   | 0.00                      | 0.89                   | -13.22                   | -16.04             | 726.91               | 2389.46 | 209.83 | 4.45                   | 1.78        | 2.03        | 58.90  |                  |                     |                      |
| Li02         | 11.45                             | 10.92                        | 11.98                   | 0.00                      | 0.53                   | -13.36                   | -16.18             | 712.89               | 2336.74 | 209.92 | 4.11                   | 1.79        | 2.03        | 57.06  |                  |                     |                      |
| Li03         | 9.03                              | 8.38                         | 10.11                   | 0.02                      | 1.06                   | -10.91                   | -13.69             | 506.64               | 1687.10 | 164.87 | 3.55                   | 2.20        | 2.05        | 74.09  |                  |                     |                      |
| Li04         | 11.80                             | 11.49                        | 11.91                   | 0.00                      | 0.11                   | -13.48                   | -16.31             | 744.93               | 2460.84 | 222.85 | 4.39                   | 1.56        | 1.79        | 54.66  |                  |                     |                      |
| Li05         | 12.90                             | 11.16                        | 13.00                   | 0.00                      | 0.09                   | -14.20                   | -17.02             | 742.91               | 2403.70 | 223.56 | 4.07                   | 1.61        | 1.84        | 53.61  |                  |                     |                      |
| Li06         | 10.86                             | 10.78                        | 12.29                   | 0.00                      | 1.43                   | -13.79                   | -16.61             | 738.92               | 2427.68 | 217.16 | 4.53                   | 1.51        | 1.79        | 54.58  |                  |                     |                      |
| Li12         | 10.73                             | 9.77                         | 11.79                   | 0.02                      | 1.05                   | -12.70                   | -15.50             | 653.82               | 2077.90 | 187.61 | 5.28                   | 2.34        | 2.09        | 60.87  |                  |                     |                      |
| Li15         | 9.64                              | 9.36                         | 11.42                   | 0.02                      | 1.76                   | -12.86                   | -15.68             | 653.82               | 2108.39 | 197.99 | 5.15                   | 1.69        | 1.58        | 48.43  |                  |                     |                      |
| Li16         | 10.19                             | 9.24                         | 11.80                   | 0.02                      | 1.32                   | -13.08                   | -15.89             | 653.82               | 2137.99 | 198.75 | 5.31                   | 1.59        | 1.54        | 47.72  |                  |                     |                      |
| Li17         | 10.39                             | 9.37                         | 11.89                   | 0.02                      | 1.48                   | -13.24                   | -16.06             | 671.81               | 2012.42 | 190.28 | 4.90                   | 2.26        | 2.21        | 70.21  |                  |                     |                      |
| Li18         | 5.83                              | 4.77                         | 7.43                    | 0.00                      | 1.87                   | -10.33                   | -13.16             | 709.92               | 2282.87 | 170.38 | 6.65                   | 2.81        | 2.60        | 77.25  |                  |                     |                      |
| Li19         | 5.89                              | 5.08                         | 7.57                    | 0.00                      | 1.67                   | -10.12                   | -12.93             | 647.85               | 2129.95 | 170.85 | 5.60                   | 2.95        | 2.75        | 73.68  |                  |                     |                      |
| Li20         | 10.48                             | 9.19                         | 12.15                   | 0.02                      | 1.66                   | -13.27                   | -16.08             | 679.86               | 2142.71 | 188.33 | 5.63                   | 2.20        | 1.99        | 60.36  |                  |                     |                      |
| Li21         | 10.46                             | 9.56                         | 11.86                   | 0.02                      | 1.37                   | -12.96                   | -15.77             | 631.81               | 2014.56 | 189.12 | 4.72                   | 2.33        | 2.13        | 70.37  |                  |                     |                      |
| Li22         | 9.43                              | 8.84                         | 11.19                   | 0.02                      | 1.73                   | -12.62                   | -15.43             | 645.84               | 2044.11 | 184.10 | 4.95                   | 2.42        | 2.18        | 73.39  |                  |                     |                      |
| Li23         | 9.90                              | 8.89                         | 11.40                   | 0.02                      | 1.48                   | -12.71                   | -15.52             | 645.84               | 2056.77 | 187.90 | 4.98                   | 2.33        | 2.11        | 71.84  |                  |                     |                      |
| Li24         | 15.55                             | 14.59                        | 20.91                   | 3.99                      | 1.32                   | -19.14                   | -21.93             | 563.69               | 1819.68 | 205.15 | 3.26                   | 0.79        | 0.68        | 21.22  |                  |                     |                      |
| Li27         | 15.13                             | 14.79                        | 21.16                   | 4.62                      | 1.40                   | -19.38                   | -22.17             | 563.69               | 1805.20 | 213.52 | 3.09                   | 0.67        | 0.54        | 18.25  |                  |                     |                      |
| Li28         | 15.38                             | 14.81                        | 21.79                   | 4.55                      | 1.86                   | -20.19                   | -22.99             | 623.75               | 1933.04 | 210.98 | 4.26                   | 0.90        | 0.80        | 29.20  |                  |                     |                      |
| Li29         | 15.06                             | 14.13                        | 21.19                   | 4.55                      | 1.58                   | -19.84                   | -22.65             | 637.78               | 1966.19 | 208.58 | 4.53                   | 1.00        | 0.88        | 32.54  |                  |                     |                      |
| Li30         | 15.26                             | 14.44                        | 21.05                   | 4.62                      | 1.18                   | -19.31                   | -22.11             | 563.69               | 1786.89 | 209.13 | 3.12                   | 0.91        | 0.75        | 22.71  |                  |                     |                      |
| Li31         | 13.28                             | 11.86                        | 19.44                   | 4.51                      | 1.65                   | -18.68                   | -21.49             | 653.82               | 2090.67 | 191.01 | 5.45                   | 1.56        | 1.48        | 47.95  |                  |                     |                      |

| Molecule | Physics-based <sup>a</sup>        |                              |                         |                           |                        |                          |                    | QikProp <sup>b</sup> |         |        |                        |             |             | Classification |                  |                     |                      |
|----------|-----------------------------------|------------------------------|-------------------------|---------------------------|------------------------|--------------------------|--------------------|----------------------|---------|--------|------------------------|-------------|-------------|----------------|------------------|---------------------|----------------------|
|          | $\Delta G_{\text{transfer(LDC)}}$ | $\Delta G_{\text{transfer}}$ | $\Delta G_{\text{c/w}}$ | $\Delta G_{\text{state}}$ | $\Delta G_{\text{cf}}$ | Log $K_{\text{barrier}}$ | Log $P_{\text{m}}$ | MW                   | Vol     | PSA    | QPlog $P_{\text{o/w}}$ | Log QPPCaco | Log QPPMDCK | QP%HOA         | PGP <sup>c</sup> | Active <sup>d</sup> | QikProp <sup>e</sup> |
| Li32     | 12.66                             | 10.09                        | 18.25                   | 4.51                      | 1.07                   | -17.93                   | -20.75             | 667.84               | 2128.26 | 188.91 | 5.66                   | 1.54        | 1.46        | 48.88          |                  |                     |                      |
| Li33     | 11.72                             | 10.47                        | 18.17                   | 4.51                      | 1.94                   | -17.95                   | -20.77             | 667.84               | 2151.16 | 192.33 | 5.78                   | 1.50        | 1.41        | 48.72          |                  |                     |                      |
| Li34     | 11.03                             | 9.87                         | 17.11                   | 4.51                      | 1.42                   | -16.86                   | -19.66             | 605.77               | 1979.82 | 189.15 | 4.51                   | 1.48        | 1.38        | 53.86          |                  |                     |                      |

<sup>a</sup> Physics-based permeability predictions. The  $\Delta G_{\text{transfer(LDC)}}$  is based on the low dielectric conformation. The  $\Delta G_{\text{transfer}}$ ,  $\Delta G_{\text{c/w}}$ , and Log  $P_{\text{m}}$  values are the optimal values produced by the conformer ensemble, i.e. the minimum value for free energy measures or the maximum value for Log  $P_{\text{m}}$ . Therefore, each of these values may not correspond to the same conformation. The  $\Delta G_{\text{cf}}$  and Log  $K_{\text{barrier}}$  values correspond to the conformation that produced the highest Log  $P_{\text{m}}$  value.

<sup>b</sup> Physiochemical descriptors and permeability predictions by QikProp.

<sup>c</sup> For “PGP”, Y indicates a P-glycoprotein substrate and N indicates a non-substrate.<sup>10-12</sup>

<sup>d</sup> For “Active”, Y indicates an active transport protein substrate.<sup>13-18</sup>

<sup>e</sup> For “QikProp”, Y indicates that the compound is part of the QikProp training sets (i.e. QPlog  $P_{\text{o/w}}$ , QPPCaco, QPPMDCK, and QP%HOA).<sup>7,19-21</sup>

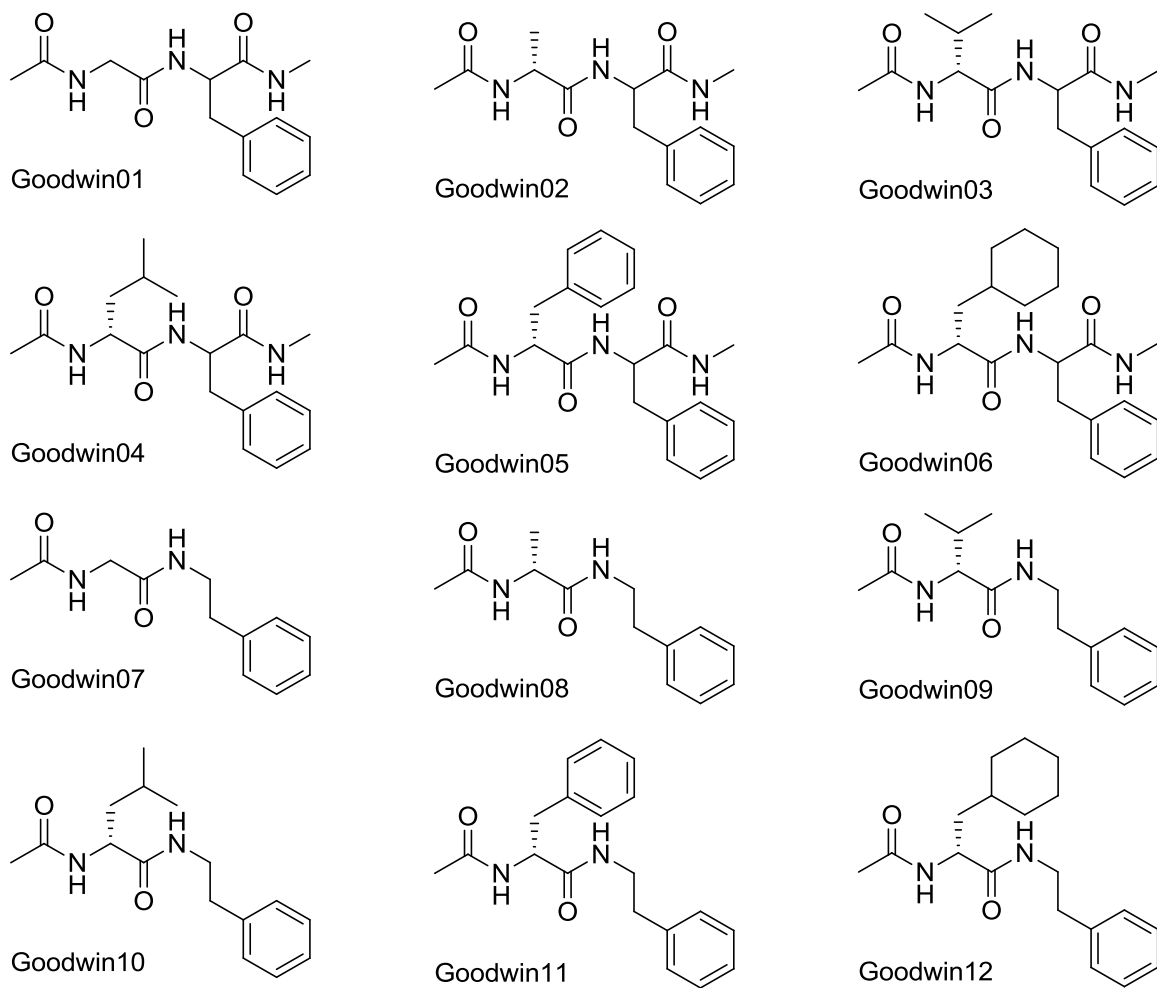

**Figure S1.** Compounds from the Goodwin set.

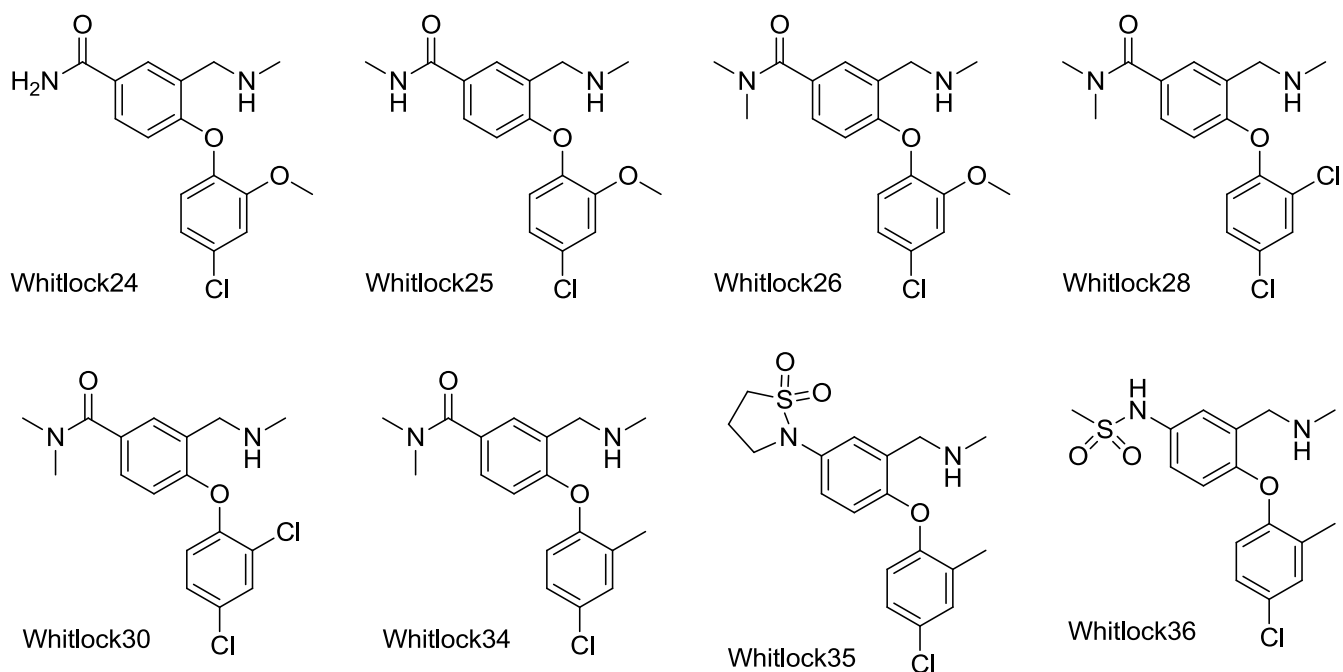

**Figure S2.** Compounds from the Whitlock set.

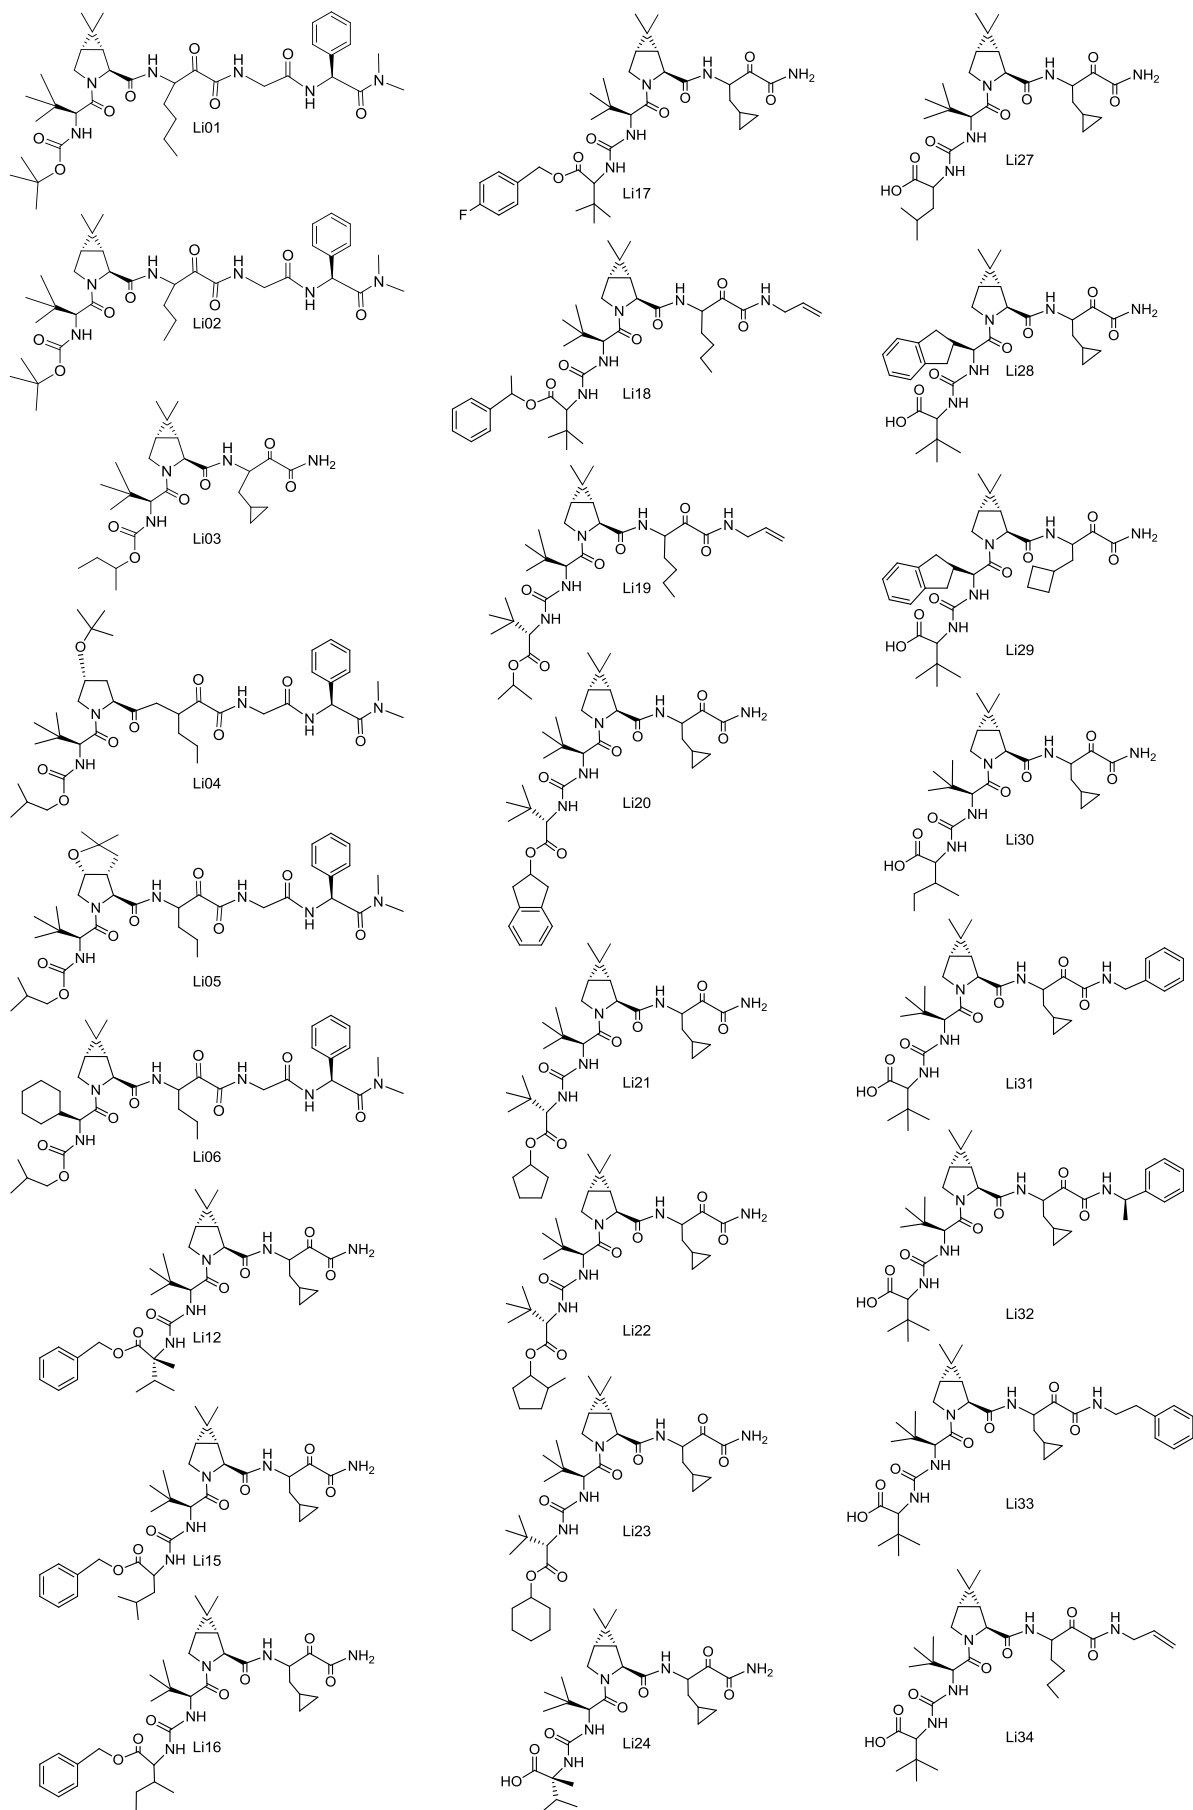

**Figure S3.** Compounds from the Li set.

**Table S3.** The correlation coefficients from linear regression analyses between cell-based assay data and physics-based permeability predictions with all compounds.

| prediction <sup>a</sup>                                     | Model's Component |                |               |               |                  |                    | Correlation Coefficient ( $r^2$ ) <sup>b</sup> |         |                   |         |                  |         |                   |         |                  |      |                 |      |               |      |             |
|-------------------------------------------------------------|-------------------|----------------|---------------|---------------|------------------|--------------------|------------------------------------------------|---------|-------------------|---------|------------------|---------|-------------------|---------|------------------|------|-----------------|------|---------------|------|-------------|
|                                                             | Conf. search      | Conf. ensemble | State penalty | Conf. penalty | Size selectivity | Membrane diffusion | Avdeef (Caco-2)                                |         | Balimane (Caco-2) |         | Bermejo (Caco-2) |         | Fujikawa (Caco-2) |         | Goodwin (Caco-2) |      | Irvine (Caco-2) |      | Irvine (MDCK) |      | Li (Caco-2) |
|                                                             |                   |                |               |               |                  |                    | All                                            | Passive | All               | Passive | All              | Passive | All               | Passive | All              | All  | Passive         | All  | Passive       | All  |             |
| Log $K(\Delta G_{\text{transfer(LDC)})$                     | ×                 |                |               |               |                  |                    | 0.70                                           | 0.67    | 0.48              | 0.56    | 0.39             | 0.39    | 0.15              | 0.32    | 0.83             | 0.43 | 0.59            | 0.49 | 0.68          | 0.49 |             |
| Log $K(\Delta G_{\text{transfer}})$                         | ×                 | ×              |               |               |                  |                    | 0.70                                           | 0.70    | 0.47              | 0.55    | 0.39             | 0.37    | 0.16              | 0.33    | 0.88             | 0.44 | 0.57            | 0.51 | 0.67          | 0.55 |             |
| Log $K(\Delta G_{\text{transfer}}+\Delta G_{\text{state}})$ | ×                 | ×              | ×             |               |                  |                    | 0.66                                           | 0.80    | 0.49              | 0.55    | 0.62             | 0.58    | 0.24              | 0.35    | 0.88             | 0.60 | 0.68            | 0.65 | 0.74          | 0.49 |             |
| Log $K(\Delta G_{\text{transfer}}+\Delta G_{\text{cf}})$    | ×                 | ×              |               | ×             |                  |                    | 0.73                                           | 0.75    | 0.47              | 0.53    | 0.48             | 0.44    | 0.15              | 0.30    | 0.82             | 0.44 | 0.61            | 0.51 | 0.70          | 0.54 |             |
| Log $K(\Delta G_{\text{c/w}})$                              | ×                 | ×              | ×             | ×             |                  |                    | 0.69                                           | 0.83    | 0.48              | 0.50    | 0.66             | 0.61    | 0.24              | 0.32    | 0.82             | 0.60 | 0.69            | 0.65 | 0.75          | 0.45 |             |
| Log $K_{\text{barrier}}$                                    | ×                 | ×              | ×             | ×             | ×                |                    | 0.71                                           | 0.84    | 0.51              | 0.55    | 0.64             | 0.59    | 0.28              | 0.34    | 0.86             | 0.60 | 0.70            | 0.65 | 0.77          | 0.45 |             |
| Log $P_{\text{m}}$                                          | ×                 | ×              | ×             | ×             | ×                | ×                  | 0.72                                           | 0.84    | 0.51              | 0.56    | 0.64             | 0.59    | 0.29              | 0.34    | 0.86             | 0.60 | 0.70            | 0.65 | 0.77          | 0.45 |             |

<sup>a</sup> Optimal values were determined from the refined conformational ensemble for each type of permeability prediction, except for Log  $K(\Delta G_{\text{transfer(LDC)})$ , which were computed using the LDC, and Log  $K_{\text{barrier}}$ , which was computed using the conformation with the optimal Log  $P_{\text{m}}$  value.

<sup>b</sup> “All” indicates the all compounds in the data set. “Passive” indicates the passive permeation subset. Models with  $\Delta r^2 \geq 0.05$  and  $\Delta r^2 \leq -0.05$  relative to Log  $K(\Delta G_{\text{transfer(LDC)})$  are highlighted in green and red, respectively.

**Table S4.** The Spearman’s rank correlation coefficients between cell-based assay data and physics-based permeability predictions with all compounds.

| prediction <sup>a</sup>                                     | Model’s Component |                |               |               |                  |                    | Spearman’s Rank Correlation Coefficient ( $\rho$ ) <sup>b</sup> |         |                   |                   |                  |                   |                   |                   |                  |      |                 |      |               |      |             |
|-------------------------------------------------------------|-------------------|----------------|---------------|---------------|------------------|--------------------|-----------------------------------------------------------------|---------|-------------------|-------------------|------------------|-------------------|-------------------|-------------------|------------------|------|-----------------|------|---------------|------|-------------|
|                                                             | Conf. search      | Conf. ensemble | State penalty | Conf. penalty | Size selectivity | Membrane diffusion | Avdeef (Caco-2)                                                 |         | Balimane (Caco-2) |                   | Bermejo (Caco-2) |                   | Fujikawa (Caco-2) |                   | Goodwin (Caco-2) |      | Irvine (Caco-2) |      | Irvine (MDCK) |      | Li (Caco-2) |
|                                                             |                   |                |               |               |                  |                    | All                                                             | Passive | All               | Passive           | All              | Passive           | All               | Passive           | All              | All  | Passive         | All  | Passive       | All  |             |
| Log $K(\Delta G_{\text{transfer(LDC)})$                     | ×                 |                |               |               |                  |                    | 0.79                                                            | 0.89    | 0.64              | 0.44 <sup>c</sup> | 0.64             | 0.50 <sup>c</sup> | 0.35 <sup>c</sup> | 0.35 <sup>c</sup> | 0.89             | 0.71 | 0.77            | 0.75 | 0.83          | 0.61 |             |
| Log $K(\Delta G_{\text{transfer}})$                         | ×                 | ×              |               |               |                  |                    | 0.78                                                            | 0.89    | 0.64              | 0.44 <sup>c</sup> | 0.60             | 0.45 <sup>c</sup> | 0.32 <sup>c</sup> | 0.35 <sup>c</sup> | 0.96             | 0.70 | 0.75            | 0.74 | 0.83          | 0.69 |             |
| Log $K(\Delta G_{\text{transfer}}+\Delta G_{\text{state}})$ | ×                 | ×              | ×             |               |                  |                    | 0.84                                                            | 0.89    | 0.67              | 0.56 <sup>c</sup> | 0.68             | 0.52 <sup>c</sup> | 0.45              | 0.43 <sup>c</sup> | 0.96             | 0.81 | 0.80            | 0.82 | 0.84          | 0.66 |             |
| Log $K(\Delta G_{\text{transfer}}+\Delta G_{\text{cf}})$    | ×                 | ×              |               | ×             |                  |                    | 0.83                                                            | 0.89    | 0.67              | 0.54 <sup>c</sup> | 0.65             | 0.47 <sup>c</sup> | 0.33 <sup>c</sup> | 0.30 <sup>c</sup> | 0.92             | 0.72 | 0.78            | 0.76 | 0.84          | 0.65 |             |
| Log $K(\Delta G_{\text{c/w}})$                              | ×                 | ×              | ×             | ×             |                  |                    | 0.81                                                            | 0.89    | 0.67              | 0.56 <sup>c</sup> | 0.71             | 0.55 <sup>c</sup> | 0.46              | 0.41 <sup>c</sup> | 0.92             | 0.82 | 0.82            | 0.82 | 0.84          | 0.64 |             |
| Log $K_{\text{barrier}}$                                    | ×                 | ×              | ×             | ×             | ×                |                    | 0.85                                                            | 0.89    | 0.71              | 0.56 <sup>c</sup> | 0.71             | 0.55 <sup>c</sup> | 0.48              | 0.37 <sup>c</sup> | 0.95             | 0.82 | 0.81            | 0.83 | 0.84          | 0.66 |             |
| Log $P_{\text{m}}$                                          | ×                 | ×              | ×             | ×             | ×                | ×                  | 0.85                                                            | 0.89    | 0.71              | 0.56 <sup>c</sup> | 0.71             | 0.55 <sup>c</sup> | 0.48              | 0.37 <sup>c</sup> | 0.95             | 0.82 | 0.81            | 0.83 | 0.84          | 0.66 |             |

<sup>a</sup> Optimal values were determined from the refined conformational ensemble for each permeability prediction, except for Log  $K(\Delta G_{\text{transfer(LDC)})$ , which were computed using the LDC, and Log  $K_{\text{barrier}}$ , which was computed using the conformation with the optimal Log  $P_{\text{m}}$  value.

<sup>b</sup> “All” indicates the all compounds in the data set. “Passive” indicates the passive permeation subset. Models with  $\Delta\rho \geq 0.05$  and  $\Delta\rho \leq -0.05$  relative to Log  $K(\Delta G_{\text{transfer(LDC)})$  are highlighted in green and red, respectively.

<sup>c</sup> The p-value is greater than 0.05.

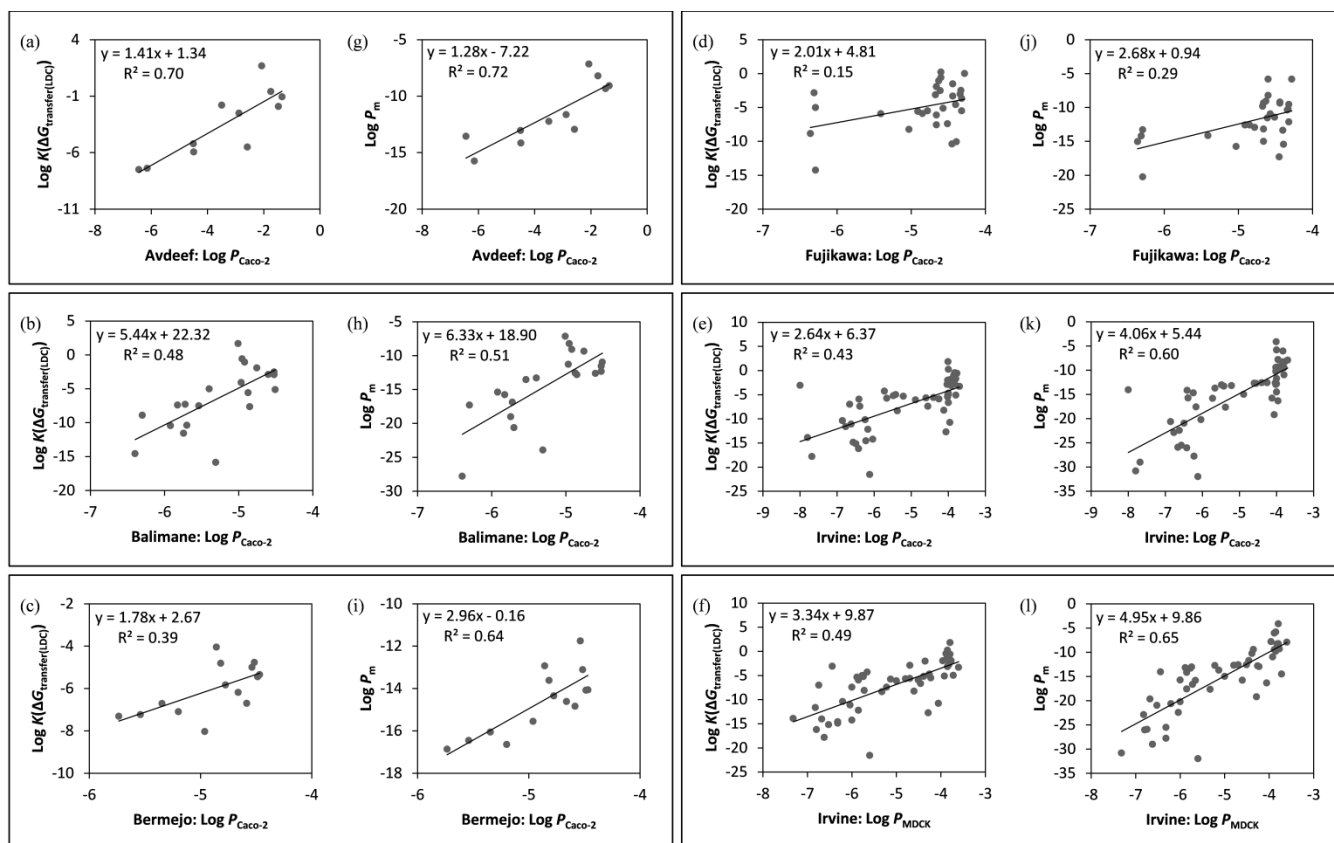

**Figure S4.** The linear regression analyses between cell-based assay data and physics-based permeability predictions with all compounds. Predictions based on  $\text{Log } K(\Delta G_{\text{transfer(LDC)}})$ : (a) Avdeef set (Caco-2), (b) Balimane set (Caco-2), (c) Bermejo set (Caco-2), (d) Fujikawa set (Caco-2), (e) Irvine set (Caco-2), and (f) Irvine set (MDCK). Predictions based on  $\text{Log } P_m$ : (g) Avdeef set (Caco-2), (h) Balimane set (Caco-2), (i) Bermejo set (Caco-2), (j) Fujikawa set (Caco-2), (k) Irvine set (Caco-2), and (l) Irvine set (MDCK).



**Table S5.** The correlation coefficients from linear regression analyses between *in vivo* data and physics-based permeability predictions with all compounds.

| prediction <sup>a</sup>                         | Model's Component |                |               |               |                  |                    | Correlation Coefficient ( $r^2$ ) <sup>b</sup> |         |                       |         |               |         |
|-------------------------------------------------|-------------------|----------------|---------------|---------------|------------------|--------------------|------------------------------------------------|---------|-----------------------|---------|---------------|---------|
|                                                 | Conf. search      | Conf. ensemble | State penalty | Conf. penalty | Size selectivity | Membrane diffusion | Balimane (%Abs)                                |         | Bermejo ( $P_{app}$ ) |         | Irvine (%Abs) |         |
|                                                 |                   |                |               |               |                  |                    | All                                            | Passive | All                   | Passive | All           | Passive |
| Log $K(\Delta G_{transfer(LDC)})$               | ×                 |                |               |               |                  |                    | 0.60                                           | 0.63    | 0.77                  | 0.73    | 0.21          | 0.65    |
| Log $K(\Delta G_{transfer})$                    | ×                 | ×              |               |               |                  |                    | 0.59                                           | 0.63    | 0.79                  | 0.75    | 0.23          | 0.66    |
| Log $K(\Delta G_{transfer} + \Delta G_{state})$ | ×                 | ×              | ×             |               |                  |                    | 0.65                                           | 0.72    | 0.91                  | 0.88    | 0.28          | 0.62    |
| Log $K(\Delta G_{transfer} + \Delta G_{cf})$    | ×                 | ×              |               | ×             |                  |                    | 0.59                                           | 0.65    | 0.81                  | 0.78    | 0.20          | 0.63    |
| Log $K(\Delta G_{c/w})$                         | ×                 | ×              | ×             | ×             |                  |                    | 0.64                                           | 0.69    | 0.89                  | 0.88    | 0.25          | 0.59    |
| Log $K_{barrier}$                               | ×                 | ×              | ×             | ×             | ×                |                    | 0.68                                           | 0.76    | 0.87                  | 0.86    | 0.24          | 0.58    |
| Log $P_m$                                       | ×                 | ×              | ×             | ×             | ×                | ×                  | 0.68                                           | 0.76    | 0.86                  | 0.86    | 0.24          | 0.58    |

<sup>a</sup> Optimal values were determined from the refined conformational ensemble for each type of permeability prediction, except  $\Delta G_{transfer(LDC)}$ , which were computed using the LDC, and Log  $K_{barrier}$ , which was computed based on the conformation with the optimal Log  $P_m$  value.

<sup>b</sup> “All” indicates the all compounds in the data set. “Passive” indicates the passive permeation subset. Models with  $\Delta r^2 \geq 0.05$  and  $\Delta r^2 \leq -0.05$  relative to Log  $K(\Delta G_{transfer(LDC)})$  are highlighted in green and red, respectively.

**Table S6.** The Spearman’s rank correlation coefficients between *in vivo* data and physics-based permeability predictions with all compounds.

| prediction <sup>a</sup>                                       | Model’s Component |                |               |               |                  |                    | Spearman’s Rank Correlation Coefficient ( $\rho$ ) <sup>b</sup> |                   |                       |         |               |         |
|---------------------------------------------------------------|-------------------|----------------|---------------|---------------|------------------|--------------------|-----------------------------------------------------------------|-------------------|-----------------------|---------|---------------|---------|
|                                                               | Conf. search      | Conf. ensemble | State penalty | Conf. penalty | Size selectivity | Membrane diffusion | Balimane (%Abs)                                                 |                   | Bermejo ( $P_{app}$ ) |         | Irvine (%Abs) |         |
|                                                               |                   |                |               |               |                  |                    | All                                                             | Passive           | All                   | Passive | All           | Passive |
| Log $K(\Delta G_{\text{transfer(LDC)}})$                      | ×                 |                |               |               |                  |                    | 0.76                                                            | 0.66 <sup>c</sup> | 0.89                  | 0.87    | 0.41          | 0.74    |
| Log $K(\Delta G_{\text{transfer}})$                           | ×                 | ×              |               |               |                  |                    | 0.77                                                            | 0.66 <sup>c</sup> | 0.89                  | 0.89    | 0.44          | 0.76    |
| Log $K(\Delta G_{\text{transfer}} + \Delta G_{\text{state}})$ | ×                 | ×              | ×             |               |                  |                    | 0.79                                                            | 0.84              | 0.95                  | 0.94    | 0.50          | 0.74    |
| Log $K(\Delta G_{\text{transfer}} + \Delta G_{\text{cf}})$    | ×                 | ×              |               | ×             |                  |                    | 0.79                                                            | 0.76              | 0.93                  | 0.91    | 0.42          | 0.74    |
| Log $K(\Delta G_{\text{c/w}})$                                | ×                 | ×              | ×             | ×             |                  |                    | 0.79                                                            | 0.84              | 0.96                  | 0.96    | 0.49          | 0.72    |
| Log $K_{\text{barrier}}$                                      | ×                 | ×              | ×             | ×             | ×                |                    | 0.82                                                            | 0.84              | 0.96                  | 0.96    | 0.50          | 0.73    |
| Log $P_m$                                                     | ×                 | ×              | ×             | ×             | ×                | ×                  | 0.82                                                            | 0.84              | 0.96                  | 0.96    | 0.50          | 0.73    |

<sup>a</sup> Optimal values were determined from the refined conformational ensemble for each type of permeability prediction, except  $\Delta G_{\text{transfer(LDC)}}$ , which were computed using the LDC, and Log  $K_{\text{barrier}}$ , which was computed based on the conformation with the optimal Log  $P_m$  value.

<sup>b</sup> “All” indicates the all compounds in the data set. “Passive” indicates the passive permeation subset. Models with  $\Delta\rho \geq 0.05$  relative to Log  $K(\Delta G_{\text{transfer(LDC)}})$  are highlighted in green.

<sup>c</sup> The p-value is greater than 0.05.

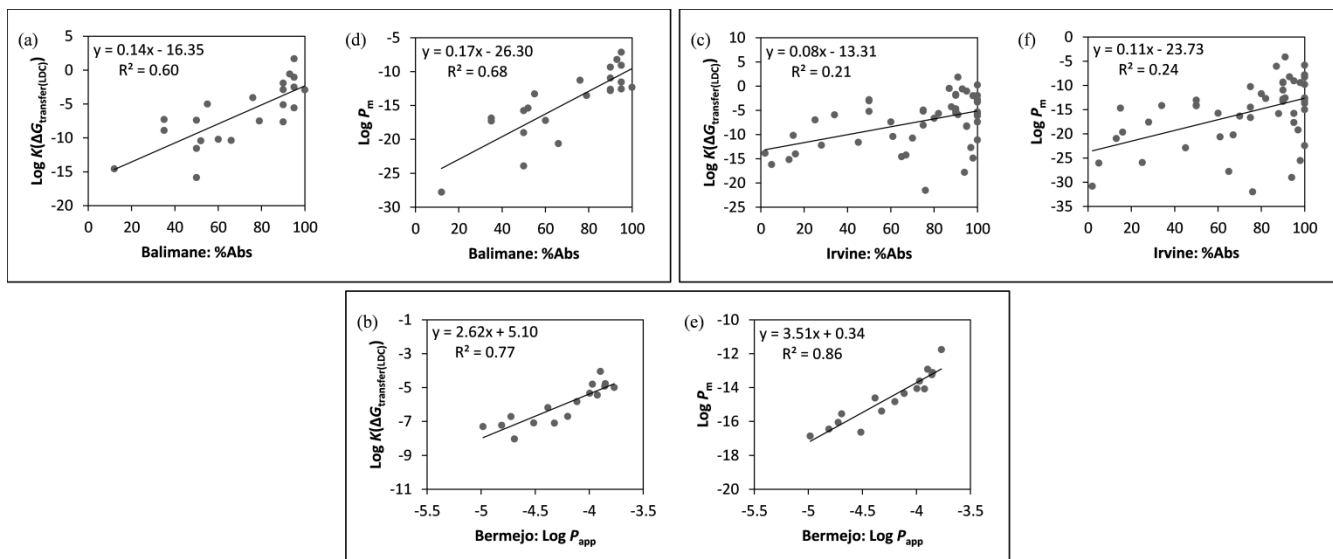

**Figure S5.** The linear regression analyses between *in vivo* data and physics-based permeability predictions with all compounds. Predictions based on  $\text{Log } K(\Delta G_{\text{transfer(LDC)})}$ : (a) Balimane set, (b) Bermejo set, and (c) Irvine set. Predictions based on  $\text{Log } P_m$ : (d) Balimane set, (e) Bermejo set, and (f) Irvine set.

**Estimation of  $K_{\text{barrier}}$  from air/water partition.** The passive diffusion model developed by Seelig *et al.* to study permeation across blood-brain barrier provides an alternative to estimate  $K_{\text{barrier}}$ . Instead of using organic solvent as a reference medium for the barrier, this approach employs the air/water partition  $K_{\text{a/w}}$ , to approximate the membrane/water partition. Experimentally,  $K_{\text{a/w}}$  can be obtained from Gibbs adsorption isotherm measurements, which provide the change in solute concentration between air and water based on the change in surface tension at the interface.<sup>22,23</sup> The contribution from the cavity creation in the membrane barrier to accommodate the permeant is evaluated by the membrane insertion potential,  $\Delta W$ , which is presumed to be proportional to the lateral packing density of the membrane,  $\pi_m$ , and the cross-sectional area of the permeant,  $A_p$ :<sup>24-26</sup>

$$\Delta W = \pi_m A_p, \quad (\text{S1})$$

Similar to the function form of the barrier domain model (Eq. 3),  $K_{\text{barrier}}$  is estimated from the air/water partition coefficient,  $K_{\text{a/w}}$ , and the shape-dependent insertion factor,  $\xi_A$ , as shown in Eq. S2.

$$K_{\text{barrier}} = K_{\text{a/w}} \xi_A, \quad (\text{S2})$$

where

$$\xi_A = e^{\frac{-\pi_m A_p}{k_B T}} \quad (\text{S3})$$

In our implementation,  $K_{\text{a/w}}$  is calculated from the air/water partition free energy,  $\Delta G_{\text{a/w}}$ , which is estimated from the free energy of solvation,  $\Delta G_{\text{solv}}$ , of the permeant membranophilic conformation. Analogous to the formulation of the chloroform/water partition energy  $\Delta G_{\text{c/w}}$  (Eq. 7),  $\Delta G_{\text{a/w}}$  is expressed in terms of  $\Delta G_{\text{solv}}$ , the state penalty,  $\Delta G_{\text{state}}$ , and conformational penalty,  $\Delta G_{\text{cf}}$ :

$$\Delta G_{\text{a/w}} = -\Delta G_{\text{solv}} + \Delta G_{\text{state}} + \Delta G_{\text{cf}} \quad (\text{S4})$$

Subsequently,  $K_{\text{a/w}}$  can be calculated from  $\Delta G_{\text{a/w}}$ :

$$K_{\text{a/w}} = 10^{\Delta G_{\text{a/w}} / -2.3RT} \quad (\text{S5})$$

Like the size-dependent  $\zeta_V$  (Eq. 4), the insertion factor,  $\xi_A$ , is also defined by properties from both the membrane and the permeant (Eq. S3). The membrane environment is described by  $\pi_m$ , which is assumed to be 35 mN/m.<sup>26</sup> The molecular shape of the permeant is assessed by its molecular cross-

sectional area,  $A_p$ . With the shape-dependent  $\xi_A$ , the partition coefficient decreases exponentially as  $A_p$  increases.

In the current implementation, the computation protocol is identical to that of the barrier domain model. In order to estimate  $A_p$ , the compound's orientation for insertion was determined by performing principal component analysis of the molecular coordinates. Assuming the first principle axis is parallel to the normal of the membrane, the first, second, and third principal axes are treated as the z-, y-, x-axes, respectively. The molecular projection on the xy-plane was measured as  $A_p$  with the atomic radii derived from the Lennard-Jones parameters of the OPLS2005 force field. The permeability coefficient based on  $K_{a/w}$ ,  $P_{m(a/w)}$ , was calculated for each conformation in the low-energy conformation ensemble of the permeant, and the optimal predicted values were subsequently determined.

The correlation coefficients ( $r^2$ ) from linear regression analyses and the Spearman's rank correlation coefficients ( $\rho$ ) of the examined data sets obtained from the barrier domain model and the passive diffusion model are summarized in Tables S7–S12. For PAMPA (Tables S7 & S8) and cell-based assay data (Tables S9 & S10), the chloroform/water-based predictions of the barrier domain model generally deliver higher  $r^2$  than those based on the air/water partition of the passive diffusion model. The Log  $P_m$  values yield higher  $r^2$  and  $\rho$  than Log  $P_{m(a/w)}$  values for most *in vitro* data sets. Results for the *in vivo* data (Tables S11 & S12) indicate that the predictions by both models are similar in accuracy.

The slopes from the linear regression analyses between physics-based predictions and different experimental data are listed in Tables S13–S15. Similar to the results from the barrier domain approach, the shape-based insertion factor and the diffusion coefficient have little effects on the slope of the linear regression model. For most of the *in vitro* data sets, the slopes of the linear regression models derived from the air/water partition values are steeper than those from the chloroform/water partition values. Both formulations of  $P_m$  yield predictions with similar slopes for *in vivo* data. Overall, the performance of both physics-based permeability models is demonstrated to be comparable. The barrier domain model, however, does produce higher correlation coefficients than those of the passive diffusion model for most *in vitro* data sets.

**Table S7.** The correlation coefficients from linear regression analyses between PAMPA data and permeability predictions based on chloroform/water and air/water partition values. For each data set, the  $P_m$  prediction with a higher  $r^2$  is highlighted in green.

| prediction                          | Correlation Coefficient ( $r^2$ ) |          |         |      |          |      |          |
|-------------------------------------|-----------------------------------|----------|---------|------|----------|------|----------|
|                                     | Avdeef                            | Balimane | Bermejo | Di   | Fujikawa | Li   | Whitlock |
| Log $K(\Delta G_{\text{transfer}})$ | 0.73                              | 0.57     | 0.80    | 0.49 | 0.43     | 0.52 | 0.62     |
| Log $K(\Delta G_{\text{c/w}})$      | 0.78                              | 0.64     | 0.88    | 0.57 | 0.56     | 0.82 | 0.74     |
| Log $P_m$                           | 0.80                              | 0.61     | 0.81    | 0.56 | 0.58     | 0.83 | 0.78     |
| Log $K(-\Delta G_{\text{solv}})$    | 0.84                              | 0.52     | 0.43    | 0.40 | 0.57     | 0.45 | 0.83     |
| Log $K(\Delta G_{\text{a/w}})$      | 0.77                              | 0.55     | 0.54    | 0.54 | 0.62     | 0.74 | 0.88     |
| Log $P_{\text{m(a/w)}}$             | 0.70                              | 0.50     | 0.47    | 0.50 | 0.59     | 0.74 | 0.88     |

**Table S8.** The Spearman's rank correlation coefficients between PAMPA data and permeability predictions based on chloroform/water and air/water partition values. For each data set, the  $P_m$  prediction with a higher  $\rho$  is highlighted in green.

| prediction                          | Spearman's Rank Correlation Coefficient ( $\rho$ ) |          |         |      |          |      |          |
|-------------------------------------|----------------------------------------------------|----------|---------|------|----------|------|----------|
|                                     | Avdeef                                             | Balimane | Bermejo | Di   | Fujikawa | Li   | Whitlock |
| Log $K(\Delta G_{\text{transfer}})$ | 0.83                                               | 0.75     | 0.95    | 0.68 | 0.63     | 0.71 | 0.89     |
| Log $K(\Delta G_{\text{c/w}})$      | 0.88                                               | 0.83     | 0.95    | 0.72 | 0.73     | 0.76 | 0.85     |
| Log $P_m$                           | 0.91                                               | 0.83     | 0.95    | 0.70 | 0.74     | 0.81 | 0.87     |
| Log $K(-\Delta G_{\text{solv}})$    | 0.94                                               | 0.78     | 0.86    | 0.66 | 0.76     | 0.58 | 0.87     |
| Log $K(\Delta G_{\text{a/w}})$      | 0.88                                               | 0.78     | 0.92    | 0.71 | 0.77     | 0.70 | 0.81     |
| Log $P_{\text{m(a/w)}}$             | 0.83                                               | 0.74     | 0.92    | 0.69 | 0.75     | 0.70 | 0.81     |

**Table S9.** The correlation coefficients from linear regression analyses between cell-based assay data and permeability predictions based on chloroform/water and air/water partition values. For each data set, the  $P_m$  prediction with a higher  $r^2$  is highlighted in green.

| prediction                          | Correlation Coefficient ( $r^2$ ) <sup>a</sup> |         |                      |         |                     |         |                      |         |                     |         |                    |         |                  |         |                |
|-------------------------------------|------------------------------------------------|---------|----------------------|---------|---------------------|---------|----------------------|---------|---------------------|---------|--------------------|---------|------------------|---------|----------------|
|                                     | Avdeef<br>(Caco-2)                             |         | Balimane<br>(Caco-2) |         | Bermejo<br>(Caco-2) |         | Fujikawa<br>(Caco-2) |         | Goodwin<br>(Caco-2) |         | Irvine<br>(Caco-2) |         | Irvine<br>(MDCK) |         | Li<br>(Caco-2) |
|                                     | All                                            | Passive | All                  | Passive | All                 | Passive | All                  | Passive | All                 | Passive | All                | Passive | All              | Passive | All            |
| Log $K(\Delta G_{\text{transfer}})$ | 0.70                                           | 0.70    | 0.47                 | 0.55    | 0.39                | 0.37    | 0.16                 | 0.33    | 0.88                | 0.44    | 0.57               | 0.51    | 0.67             | 0.55    |                |
| Log $K(\Delta G_{\text{c/w}})$      | 0.69                                           | 0.83    | 0.48                 | 0.50    | 0.66                | 0.61    | 0.24                 | 0.32    | 0.82                | 0.60    | 0.69               | 0.65    | 0.75             | 0.45    |                |
| Log $P_m$                           | 0.72                                           | 0.84    | 0.51                 | 0.56    | 0.64                | 0.59    | 0.29                 | 0.34    | 0.86                | 0.60    | 0.70               | 0.65    | 0.77             | 0.45    |                |
| Log $K(-\Delta G_{\text{solv}})$    | 0.84                                           | 0.82    | 0.63                 | 0.81    | 0.26                | 0.27    | 0.26                 | 0.43    | 0.83                | 0.44    | 0.60               | 0.54    | 0.73             | 0.45    |                |
| Log $K(\Delta G_{\text{a/w}})$      | 0.72                                           | 0.76    | 0.61                 | 0.69    | 0.51                | 0.49    | 0.36                 | 0.42    | 0.84                | 0.56    | 0.68               | 0.65    | 0.80             | 0.40    |                |
| Log $P_{\text{m(a/w)}}$             | 0.67                                           | 0.73    | 0.60                 | 0.70    | 0.48                | 0.47    | 0.38                 | 0.43    | 0.82                | 0.55    | 0.68               | 0.64    | 0.81             | 0.39    |                |

<sup>a</sup> “All” indicates the all compounds in the data set. “Passive” indicates the passive permeation subset.

**Table S10.** The Spearman’s rank correlation coefficients between cell-based assay data and permeability predictions based on chloroform/water and air/water partition values. For each data set, the  $P_m$  prediction with a higher  $\rho$  is highlighted in green.

| predicted permeability              | Spearman’s Rank Correlation Coefficient ( $\rho$ ) <sup>a</sup> |         |                      |                   |                     |                   |                      |                   |                     |         |                    |         |                  |         |                |
|-------------------------------------|-----------------------------------------------------------------|---------|----------------------|-------------------|---------------------|-------------------|----------------------|-------------------|---------------------|---------|--------------------|---------|------------------|---------|----------------|
|                                     | Avdeef<br>(Caco-2)                                              |         | Balimane<br>(Caco-2) |                   | Bermejo<br>(Caco-2) |                   | Fujikawa<br>(Caco-2) |                   | Goodwin<br>(Caco-2) |         | Irvine<br>(Caco-2) |         | Irvine<br>(MDCK) |         | Li<br>(Caco-2) |
|                                     | All                                                             | Passive | All                  | Passive           | All                 | Passive           | All                  | Passive           | All                 | Passive | All                | Passive | All              | Passive | All            |
| Log $K(\Delta G_{\text{transfer}})$ | 0.78                                                            | 0.89    | 0.64                 | 0.44 <sup>b</sup> | 0.60                | 0.45 <sup>b</sup> | 0.32 <sup>b</sup>    | 0.35 <sup>b</sup> | 0.96                | 0.70    | 0.75               | 0.74    | 0.83             | 0.69    |                |
| Log $K(\Delta G_{\text{c/w}})$      | 0.81                                                            | 0.89    | 0.67                 | 0.56 <sup>b</sup> | 0.71                | 0.55 <sup>b</sup> | 0.46                 | 0.41 <sup>b</sup> | 0.92                | 0.82    | 0.82               | 0.82    | 0.84             | 0.64    |                |
| Log $P_m$                           | 0.85                                                            | 0.89    | 0.71                 | 0.56 <sup>b</sup> | 0.71                | 0.55 <sup>b</sup> | 0.48                 | 0.37 <sup>b</sup> | 0.95                | 0.82    | 0.81               | 0.83    | 0.84             | 0.66    |                |
| Log $K(-\Delta G_{\text{solv}})$    | 0.95                                                            | 0.94    | 0.78                 | 0.62 <sup>b</sup> | 0.56                | 0.40 <sup>b</sup> | 0.38                 | 0.30 <sup>b</sup> | 0.87                | 0.73    | 0.78               | 0.78    | 0.85             | 0.55    |                |
| Log $K(\Delta G_{\text{a/w}})$      | 0.83                                                            | 0.89    | 0.73                 | 0.50 <sup>b</sup> | 0.67                | 0.50 <sup>b</sup> | 0.54                 | 0.30 <sup>b</sup> | 0.90                | 0.81    | 0.83               | 0.84    | 0.88             | 0.51    |                |
| Log $P_{\text{m(a/w)}}$             | 0.83                                                            | 0.89    | 0.73                 | 0.46 <sup>b</sup> | 0.67                | 0.50 <sup>b</sup> | 0.51                 | 0.28 <sup>b</sup> | 0.90                | 0.80    | 0.83               | 0.83    | 0.88             | 0.49    |                |

<sup>a</sup> “All” indicates the all compounds in the data set. “Passive” indicates the passive permeation subset.

<sup>b</sup> The p-value is greater than 0.05.

**Table S11.** The correlation coefficients from linear regression analyses between *in vivo* data and permeability predictions based on chloroform/water and air/water partition values. For each data set, the  $P_m$  prediction with a higher  $r^2$  is highlighted in green.

| prediction                   | Correlation Coefficient ( $r^2$ ) |         |                          |         |                  |         |
|------------------------------|-----------------------------------|---------|--------------------------|---------|------------------|---------|
|                              | Balimane<br>(%Abs)                |         | Bermejo<br>( $P_{app}$ ) |         | Irvine<br>(%Abs) |         |
|                              | All                               | Passive | All                      | Passive | All              | Passive |
| Log $K(\Delta G_{transfer})$ | 0.59                              | 0.63    | 0.79                     | 0.75    | 0.23             | 0.66    |
| Log $K(\Delta G_{c/w})$      | 0.64                              | 0.69    | 0.89                     | 0.88    | 0.25             | 0.59    |
| Log $P_m$                    | 0.68                              | 0.76    | 0.86                     | 0.86    | 0.24             | 0.58    |
| Log $K(-\Delta G_{solv})$    | 0.72                              | 0.84    | 0.63                     | 0.58    | 0.21             | 0.63    |
| Log $K(\Delta G_{a/w})$      | 0.74                              | 0.82    | 0.71                     | 0.70    | 0.23             | 0.59    |
| Log $P_{m(a/w)}$             | 0.73                              | 0.83    | 0.67                     | 0.66    | 0.22             | 0.58    |

<sup>a</sup> “All” indicates the all compounds in the data set. “Passive” indicates the passive permeation subset.

**Table S12.** The Spearman’s rank correlation coefficients between *in vivo* data and permeability predictions based on chloroform/water and air/water partition values. For each data set, the  $P_m$  prediction with a higher  $\rho$  is highlighted in green.

| prediction                   | Spearman’s Rank Correlation Coefficient ( $\rho$ ) <sup>a</sup> |                   |                          |                      |                  |         |
|------------------------------|-----------------------------------------------------------------|-------------------|--------------------------|----------------------|------------------|---------|
|                              | Balimane<br>(%Abs)                                              |                   | Bermejo<br>( $P_{app}$ ) |                      | Irvine<br>(%Abs) |         |
|                              | All                                                             | Passive           | All <sup>c</sup>         | Passive <sup>c</sup> | All              | Passive |
| Log $K(\Delta G_{transfer})$ | 0.77                                                            | 0.66 <sup>b</sup> | 0.89                     | 0.89                 | 0.44             | 0.76    |
| Log $K(\Delta G_{c/w})$      | 0.79                                                            | 0.84              | 0.96                     | 0.96                 | 0.49             | 0.72    |
| Log $P_m$                    | 0.82                                                            | 0.84              | 0.96                     | 0.96                 | 0.50             | 0.73    |
| Log $K(-\Delta G_{solv})$    | 0.84                                                            | 0.84              | 0.90                     | 0.89                 | 0.44             | 0.72    |
| Log $K(\Delta G_{a/w})$      | 0.82                                                            | 0.76              | 0.96                     | 0.96                 | 0.45             | 0.70    |
| Log $P_{m(a/w)}$             | 0.83                                                            | 0.71              | 0.96                     | 0.96                 | 0.46             | 0.70    |

<sup>a</sup> “All” indicates the all compounds in the data set. “Passive” indicates the passive permeation subset.

<sup>b</sup> The p-value is greater than 0.05.

<sup>c</sup> Log  $P_m$  and Log  $P_{m(a/w)}$  give identical  $\rho$ .



**Table S13.** Slopes from linear regression analyses between PAMPA data and permeability predictions based on chloroform/water and air/water partition values. For each data set, the  $P_m$  prediction with a slope closer to 1 is highlighted in green.

| prediction                          | Slope of Linear Regression Model ( $ m $ ) |          |         |      |          |      |          |
|-------------------------------------|--------------------------------------------|----------|---------|------|----------|------|----------|
|                                     | Avdeef                                     | Balimane | Bermejo | Di   | Fujikawa | Li   | Whitlock |
| Log $K(\Delta G_{\text{transfer}})$ | 0.96                                       | 3.88     | 1.23    | 3.04 | 2.56     | 1.31 | 3.68     |
| Log $K(\Delta G_{\text{c/w}})$      | 0.99                                       | 4.73     | 1.77    | 4.35 | 3.29     | 2.83 | 5.08     |
| Log $P_m$                           | 0.90                                       | 4.53     | 1.60    | 4.26 | 3.53     | 2.74 | 5.19     |
| Log $K(-\Delta G_{\text{solv}})$    | 1.07                                       | 4.99     | 0.89    | 3.50 | 4.59     | 1.61 | 5.53     |
| Log $K(\Delta G_{\text{a/w}})$      | 1.09                                       | 5.93     | 1.36    | 4.92 | 5.42     | 3.36 | 7.26     |
| Log $P_{\text{m(a/w)}}$             | 1.03                                       | 5.68     | 1.35    | 4.67 | 5.60     | 3.29 | 7.27     |

**Table S14.** Slopes from linear regression analyses between cell-based assay data (active-transport compounds excluded) and permeability predictions based on chloroform/water and air/water partition values. For each data set, the  $P_m$  prediction with a slope closer to 1 is highlighted in green.

| prediction                          | Slope of Linear Regression Model ( $ m $ ) |                      |                     |                      |                     |                    |                  |                |
|-------------------------------------|--------------------------------------------|----------------------|---------------------|----------------------|---------------------|--------------------|------------------|----------------|
|                                     | Avdeef<br>(Caco-2)                         | Balimane<br>(Caco-2) | Bermejo<br>(Caco-2) | Fujikawa<br>(Caco-2) | Goodwin<br>(Caco-2) | Irvine<br>(Caco-2) | Irvine<br>(MDCK) | Li<br>(Caco-2) |
| Log $K(\Delta G_{\text{transfer}})$ | 1.33                                       | 3.61                 | 1.55                | 3.72                 | 2.14                | 3.00               | 3.52             | 2.65           |
| Log $K(\Delta G_{\text{c/w}})$      | 1.52                                       | 3.47                 | 3.10                | 3.49                 | 1.79                | 4.16               | 4.65             | 4.15           |
| Log $P_m$                           | 1.49                                       | 3.69                 | 2.95                | 3.49                 | 1.83                | 4.20               | 4.71             | 4.00           |
| Log $K(-\Delta G_{\text{solv}})$    | 1.70                                       | 6.33                 | 2.17                | 5.30                 | 2.67                | 4.77               | 5.70             | 3.19           |
| Log $K(\Delta G_{\text{a/w}})$      | 1.90                                       | 6.43                 | 3.62                | 5.21                 | 2.91                | 6.02               | 7.01             | 4.87           |
| Log $P_{\text{m(a/w)}}$             | 1.84                                       | 6.38                 | 3.10                | 5.31                 | 3.01                | 6.04               | 7.06             | 4.68           |

**Table S15.** Slopes from linear regression analyses between *in vivo* data (active-transport compounds excluded) and permeability predictions based on chloroform/water and air/water partition values. For each data set, the  $P_m$  prediction with a slope closer to 1 is highlighted in green.

| prediction                   | Slope of Linear Regression Model ( $ m $ ) |                          |                  |
|------------------------------|--------------------------------------------|--------------------------|------------------|
|                              | Balimane<br>(%Abs)                         | Bermejo<br>( $P_{app}$ ) | Irvine<br>(%Abs) |
| Log $K(\Delta G_{transfer})$ | 0.09                                       | 2.43                     | 0.12             |
| Log $K(\Delta G_{c/w})$      | 0.10                                       | 3.97                     | 0.14             |
| Log $P_m$                    | 0.10                                       | 3.73                     | 0.14             |
| Log $K(-\Delta G_{solv})$    | 0.15                                       | 2.17                     | 0.18             |
| Log $K(\Delta G_{a/w})$      | 0.17                                       | 3.62                     | 0.20             |
| Log $P_{m(a/w)}$             | 0.16                                       | 3.76                     | 0.20             |

## References

1. Avdeef, A.; Artursson, P.; Neuhoff, S.; Lazorova, L.; Grasjo, J.; Tavelin, S. Caco-2 permeability of weakly basic drugs predicted with the Double-Sink PAMPA pK(a)(flux) method. *European Journal of Pharmaceutical Sciences* **2005**, *24*, 333-349.
2. Balimane, P. V.; Han, Y. H.; Chong, S. H. Current industrial practices of assessing permeability and P-glycoprotein interaction. *AAPS Journal* **2006**, *8*, E1-E13.
3. Bermejo, M.; Avdeef, A.; Ruiz, A.; Nalda, R.; Ruell, J. A.; Tsinman, O.; Gonzalez, I.; Fernandez, C.; Sanchez, G.; Garrigues, T. M.; Merino, V. PAMPA - a drug absorption in vitro model 7. Comparing rat in situ, Caco-2, and PAMPA permeability of fluoroquinolones. *European Journal of Pharmaceutical Sciences* **2004**, *21*, 429-441.
4. Di, L.; Kerns, E. H.; Fan, K.; McConnell, O. J.; Carter, G. T. High throughput artificial membrane permeability assay for blood-brain barrier. *European Journal of Medicinal Chemistry* **2003**, *38*, (3), 223-232.
5. Fujikawa, M.; Nakao, K.; Shimizu, R.; Akamatsu, M. QSAR study on permeability of hydrophobic compounds with artificial membranes. *Bioorg. Med. Chem.* **2007**, *15*, 3756-3767.
6. Goodwin, J. T.; Conradi, R. A.; Ho, N. F. H.; Burton, P. S. Physicochemical determinants of passive membrane permeability: Role of solute hydrogen-bonding potential and volume. *J. Med. Chem.* **2001**, *44*, 3721-3729.
7. Irvine, J. D.; Takahashi, L.; Lockhart, K.; Cheong, J.; Tolan, J. W.; Selick, H. E.; Grove, J. R., MDCK (Madin-Darby canine kidney) cells: A tool for membrane permeability screening. *Journal of Pharmaceutical Sciences* **1999**, *88*, (1), 28-33.
8. Li, C.; Nair, L.; Liu, T. T.; Li, F. B.; Pichardo, J.; Agrawal, S.; Chase, R.; Tong, X.; Uss, A. S.; Bogen, S.; Njoroge, F. G.; Morrison, R. A.; Cheng, K. C. Correlation between PAMPA permeability

and cellular activities of hepatitis C virus protease inhibitors. *Biochemical Pharmacology* **2008**, *75*, 1186-1197.

9. Whitlock, G. A.; Blagg, J.; Fish, P. V. 1-(2-Phenoxyphenyl)methanamines: SAR for dual serotonin/noradrenaline reuptake inhibition, metabolic stability and hERG affinity. *Bioorg. Med. Chem. Lett.* **2008**, *18*, 596-599.

10. Li, W. X.; Li, L. P.; Eksterowicz, J.; Ling, X. F. B.; Cardozo, M. Significance analysis and multiple pharmacophore models for differentiating P-glycoprotein substrates. *J. Chem. Inf. Model.* **2007**, *47*, 2429-2438.

11. Penzotti, J. E.; Lamb, M. L.; Evensen, E.; Grootenhuis, P. D. J. A computational ensemble pharmacophore model for identifying substrates of P-glycoprotein. *J. Med. Chem.* **2002**, *45*, 1737-1740.

12. Thiel-Demby, V. E.; Hmpheys, J. E.; Williams, I.; Elers, H. M.; Shah, N.; Ayrton, A. D.; Polli, J. W. Biopharmaceutics Classification System: Validation and Learnings of an in Vitro Permeability Assay. *Molecular Pharmaceutics* **2009**, *6*, 11-18.

13. Dobson, P. D.; Kell, D. B. Opinion - Carrier-mediated cellular uptake of pharmaceutical drugs: an exception or the rule? *Nat. Rev. Drug Discov.* **2008**, *7*, 205-220.

14. Hou, T. J.; Wang, J. M.; Zhang, W.; Xu, X. J. ADME evaluation in drug discovery. 7. Prediction of oral absorption by correlation and classification. *J. Chem. Inf. Model.* **2007**, *47*, 208-218.

15. Moaddel, R.; Ravichandran, S.; Bighi, F.; Yamaguchi, R.; Wainer, I. W. Pharmacophore modelling of stereoselective binding to the human organic cation transporter (hOCT1). *British Journal of Pharmacology* **2007**, *151*, 1305-1314.

16. Liang, E.; Proudfoot, J.; Yazdanian, M., Mechanisms of transport and structure-permeability relationship of sulfasalazine and its analogs in Caco-2 cell monolayers. *Pharmaceutical Research* **2000**, *17*, (10), 1168-1174.

17. Flanagan, S. D.; Takahashi, L. H.; Liu, X. L.; Benet, L. Z., Contributions of saturable active secretion, passive transcellular, and paracellular diffusion to the overall transport of furosemide across adenocarcinoma (Caco-2) cells. *Journal of Pharmaceutical Sciences* **2002**, *91*, (4), 1169-1177.
18. Chen, M. L.; Yu, L., The Use of Drug Metabolism for Prediction of Intestinal Permeability. *Molecular Pharmaceutics* **2009**, *6*, (1), 74-81.
19. Lipinski, C. A.; Lombardo, F.; Dominy, B. W.; Feeney, P. J. Experimental and computational approaches to estimate solubility and permeability in drug discovery and development settings. *Adv. Drug Delivery Rev.* **1997**, *23*, 3-25.
20. Yazdanian M.; Glynn, S. L.; Wright, J. L.; Hawi A. Correlating partitioning and caco-2 cell permeability of structurally diverse small molecular weight compounds. *Pharm. Res.* **1998**, *15*, 1490–1494.
21. Stenberg, P.; Norinder, U.; Luthman, K.; Artursson, P. Experimental and Computational Screening Models for the Prediction of Intestinal Drug Absorption. *J. Med. Chem.* **2001**, *44*, 1927–1937.
22. Fischer, H.; Gottschlich, R.; Seelig, A. Blood-brain barrier permeation: Molecular parameters governing passive diffusion. *J. Membr. Biol.* **1998**, *165*, 201-211.
23. Seelig, A.; Gottschlich, R.; Devant, R. M. A method to determine the ability of drugs to diffuse through the blood-brain-barrier. *Proc. Natl. Acad. Sci. U.S.A.* **1994**, *91*, 68-72.
24. Boguslavsky, V.; Rebecchi, M.; Morris, A. J.; Jhon, D. Y.; Rhee, S. G.; McLaughlin, S. Effect of Monolayer Surface Pressure on the Activities of Phosphoinositide-Specific Phospholipase C-beta 1, -gamma 1, and -delta 1. *Biochemistry* **1994**, *33*, 3032-3037.
25. Gerebtzoff, G.; Seelig, A. In silico prediction of blood - Brain barrier permeation using the calculated molecular cross-sectional area as main parameter. *J. Chem. Inf. Model.* **2006**, *46*, 2638-2650.

26. Seelig, A. The role of size and charge for blood-brain barrier permeation of drugs and fatty acids.

*Journal of Molecular Neuroscience* **2007**, 33, 32-41.
